1     **Intracellular signaling through the *comRS* system in *Streptococcus***  
2                                    ***mutans* genetic competence**

3  
4  
5  
6  
7  
8  
9  
10  
11  
12  
13  
14  
15  
16  
17  
18  
19  
20  
21  
22  
23

Simon A.M. Underhill<sup>1</sup>, Robert C. Shields<sup>2</sup>, Justin R. Kaspar<sup>2</sup>, Momin Haider<sup>1</sup>,  
Robert A. Burne<sup>2</sup> and Stephen J. Hagen<sup>\*1</sup>

<sup>1</sup>Department of Physics, University of Florida, 2001 Museum Road, Gainesville, Florida,  
USA,

<sup>2</sup> Department of Oral Biology, University of Florida, 1395 Center Drive, Gainesville,  
Florida, USA

\*Corresponding author

Tel. 352 392 4716

Email: [sjhagen@ufl.edu](mailto:sjhagen@ufl.edu).

24  
25  
26  
27  
28  
29  
30  
31  
32  
33  
34  
35  
36  
37  
38  
39  
40  
41  
42  
43  
44  
45

## Abstract

Entry into genetic competence in streptococci is controlled by ComX, an alternative sigma factor for genes that enable the import of exogenous DNA. In *Streptococcus mutans*, the immediate activator of *comX* is the ComRS signaling system, which consists of the cytosolic receptor ComR and the 7-residue signal peptide XIP, which is derived from ComS. Extracellular XIP imported by an oligopeptide permease interacts with ComR to form a transcriptional activator for both *comX* and *comS*. Therefore, extracellular XIP can function as an exogenous signal to trigger *S. mutans* competence. However, the mechanisms that process ComS and export it as XIP are not fully known in *S. mutans*. The observation that *comX* is expressed bimodally under some environmental conditions suggests that ComR may also interact with endogenously produced XIP or ComS, creating an intracellular positive feedback loop in *comS* transcription. Here we use single cell and microfluidic methods to compare the effects of the native *comS* gene and extracellular XIP on *comX* expression. We find that deletion of *comS* reduces the response of *comX* to extracellular XIP. We also find that *comS*-overexpressing cells autoactivate their *comX* even when their growth medium is rapidly exchanged, although this autoactivation requires an intact copy of *comS* under control of its own promoter. However *comS*-overexpressing cells do not activate *comS*-deficient mutants growing in coculture. These data show that individual cells can activate *comX* without exporting or importing the XIP or ComS signal, and that endogenously and exogenously produced ComS/XIP have inequivalent effects on *comX* behavior. These data are fully consistent with a model in which intracellular positive

46 feedback in *comS* transcription plays a role in ComRS signaling, and is responsible for  
47 the bimodal expression of *comX*.

48

## 49 **Author Summary**

50 Heterogeneous gene expression in genetically identical populations plays an important  
51 role in bacterial persistence and survival under changing environmental conditions. In  
52 the oral pathogen *Streptococcus mutans*, the physiological state of genetic competence  
53 can exhibit bimodality, with only some cells becoming competent. *S. mutans* controls its  
54 entry into competence by using the ComRS signaling system to activate *comX*, a gene  
55 encoding the master competence regulator ComX. The ComRS system is understood  
56 as a quorum sensing system, in which the extracellular accumulation of the small signal  
57 peptide XIP, derived from ComS, induces *comX* expression. We coupled observation of  
58 bacteria that fluoresce when *comX* is active with mathematical analysis and chemical  
59 binding assays to show that activation of *comX* does not necessarily require  
60 extracellular XIP or ComS, and that *comX*-active cells do not necessarily export XIP.  
61 Our experiments and mathematical modeling indicate that a positive feedback loop in  
62 *comS* transcription allows a cell to activate *comX* in response to its own XIP or ComS in  
63 the absence of extracellular XIP, or to amplify its *comX* response to extracellular XIP if  
64 present. Such positive feedback loops are often the cause of bimodal gene expression  
65 like that seen in *S. mutans* competence.

66

67

## Introduction

68

69

70

71

72

73

74

75

76

77

78

79

80

81

82

83

84

85

86

87

88

89

*Streptococcus mutans* inhabits human oral biofilms and is an important etiological agent of dental caries [1]. Many of the behaviors of *S. mutans* that facilitate its growth, competition, stress tolerance, and virulence are linked to the regulation of genetic competence, a transient physiological state during which the organism can import DNA from its environment. Biofilm formation, bacteriocin biosynthesis, tolerance of oxidative and pH stresses, carbohydrate utilization and many other behaviors of *S. mutans* interact with the pathway that controls entry into competence [2-7]. This competence pathway is complex, as it receives input from extracellular peptide signals and environmental cues that include pH [8, 9], carbohydrate source [10] and other growth conditions [11]. Competence regulation in *S. mutans* also involves mechanisms of regulatory feedback that can drive bimodality and other complex behaviors [11-14]. Consequently, although many elements of the *S. mutans* competence pathway have been described in detail, several key elements of the mechanisms and dynamics of regulation are not well understood.

*S. mutans* initiates entry into the competent state by increasing the transcription of the *comX* gene (sometimes referred to as *sigX*), which encodes an alternative sigma factor that is required for the expression of approximately 30 late competence genes [15]. Many of these genes encode products that are required for DNA uptake, processing of single-stranded DNA and homologous recombination [15, 16]. Expression of *comX* is controlled by the peptides CSP and XIP, and the efficacy of these peptides is strongly influenced by environmental conditions. CSP (competence stimulating peptide) is derived by cleavage of a 21-residue peptide from ComC and export through an ATP-

90 binding cassette transporter. It is further processed to the active 18-residue peptide by  
91 the SepM protease [17]. Extracellular CSP is detected by the two-component signal  
92 transduction system ComDE, with the phosphorylated response regulator ComE  
93 activating genes for bacteriocin synthesis and immunity. ComE does not directly  
94 activate *comX*. Rather it affects *comX* indirectly via the intracellular bacteriocin CipB,  
95 through a pathway that is not understood [18].

96 In *S. mutans* and streptococci of the salivarius, bovis and pyogenic groups, the  
97 immediate regulator of *comX* is the ComRS system. ComR is an Rgg-like cytosolic  
98 transcriptional regulator and the type II ComS of *S. mutans* is a 17-residue peptide. The  
99 C-terminus of ComS contains the 7-residue small hydrophobic peptide XIP (*sigX*-  
100 inducing peptide). Extracellular XIP is imported by the Opp permease and interacts with  
101 ComR to form a transcriptional activator for both *comX* and *comS* [19, 20]. Notably, the  
102 *S. mutans* competence pathway contains at least two elements of positive feedback, as  
103 XIP/ComR activates *comS* and ComX activates *comE* expression [19, 20].

104 An intriguing property of *S. mutans* competence is that although exogenous CSP  
105 and XIP can both activate *comX* and induce transformability, they do so under different  
106 environmental conditions and they elicit qualitatively different behaviors in the  
107 expression of *comX* [11]. Exogenous CSP elicits a bimodal response in which less than  
108 half of the population activates *comX*; exogenous XIP elicits a unimodal response in  
109 which all cells in the population activate *comX*. Further, CSP activates *comX* only in  
110 complex media containing small peptides, and only in cells carrying an intact *comS*.  
111 Activation by CSP does not require the permease gene *opp*. By contrast, exogenous  
112 XIP activates *comX* only in defined media lacking small peptides [11, 21], and only in

113 cells that carry *opp*. Activation by XIP does not require *comS* [20]. Therefore, although  
114 exogenous XIP can compensate for a *comS* deletion and activate *comX*, the bimodal  
115 *comX* response still requires an intact *comS* gene.

116 The observation that competence in several streptococcal species is directly  
117 stimulated by an extracellular ComS-derived peptide suggests that ComRS constitutes  
118 a novel type of Gram positive quorum signaling system, in which the ComS-derived  
119 signal XIP is processed and secreted, accumulates in the extracellular medium, and is  
120 then reimported. This interpretation in *S. mutans* is supported by several experimental  
121 observations. First, cells that carry *opp* take up exogenous XIP (in defined medium) and  
122 activate *comX* with high efficiency [20, 21]. Second, exogenous synthetic XIP is  
123 dramatically more effective in stimulating transformability than is exogenous full-length  
124 ComS [20]. Third, filtrates of *S. mutans* cultures grown to  $OD_{550} = 0.4$  in defined medium  
125 were able to stimulate a *PcomX* reporter strain [21]. Similarly, LC-MS/MS analysis of  
126 supernatants of *S. mutans* cultures grown to high density [22, 23] showed evidence of  
127 XIP. Fourth, a transposon mutagenesis screen in *S. pyogenes* identified the widely  
128 conserved *pptAB* ABC transporter as a possible exporter of short hydrophobic peptides  
129 of the ComS type [24], raising the possibility that *S. mutans* may also possess a  
130 dedicated export mechanism for ComS or XIP.

131 However, although dedicated mechanisms that process and export the CSP  
132 signal in *S. mutans* are well characterized, corresponding mechanisms for *S. mutans*  
133 ComS remain to be identified. Although there is evidence that the Eep membrane  
134 protease facilitates the processing of *S. thermophilus* ComS [25], Eep was not found to  
135 be involved in the processing of *S. mutans* ComS [22]. Further, although *S. mutans*

136 possesses a PptAB-like exporter with a fairly high degree of homology to PptAB of *S.*  
137 *pyogenes*, deletion of *pptAB* in *S. mutans* had only a weak effect on competence  
138 induction in mid-exponential phase cultures [24]. These findings leave open the  
139 question of how ComS is processed to XIP and exported. Recent co-culture studies [26]  
140 showed that deletion of the autolysin gene *atlA* impeded the ability of *comS*-  
141 overexpressing cells to induce *comX* in cocultured cells that lacked *comS*. This finding  
142 suggests that XIP in *S. mutans* lacks its own exporter and is released from the cells  
143 primarily through lysis.

144         The import of XIP presents an additional puzzle for ComRS quorum signaling, as  
145 the permease OppA is not required for exogenous CSP to activate *comX*, but is  
146 required for XIP to activate *comX*. It has been suggested that bacteriocin production  
147 induced by CSP may create another entry route for extracellular XIP by increasing  
148 membrane permeability [12]. However, such a model implies, contrary to data [11], that  
149 CSP should also induce *comX* in defined growth media. In addition this permeability  
150 model does not explain the characteristic bimodal response of *comX* to extracellular  
151 CSP, as the CSP/ComDE pathway induces bacteriocin genes such as *cipB* unimodally  
152 (population-wide) [20].

153         The lack of an established mechanism for processing and export of ComS, and  
154 the experimental link between *comX* bimodality and the endogenous production (via  
155 *comS*) – but not the import (via Opp) – of XIP raise the question of whether the ComRS  
156 system can activate *comX* through purely intracellular signaling, at least under some  
157 environmental conditions. Intracellular transcriptional feedback is often a cause of  
158 bimodality in bacterial gene expression [27]. An ability to activate *comX* through

159 endogenously produced, intracellular ComS (or XIP) would potentially allow individual  
160 *S. mutans* within a population to exhibit different competence behavior, without requiring  
161 accumulation or import of extracellular XIP [14]. Here we used a combination of  
162 microfluidic and continuous flow experiments, including coculture studies using *comS*  
163 deletion and *comS* overexpressing strains, to test whether activation of *comX* is  
164 necessarily accompanied by import or export of XIP and to assess the contribution of  
165 endogenous ComS production to *comX* activation in individual cells.

166

167

## Results

### 168 **An intact copy of *comS* alters the *comX* response to exogenous XIP**

169 Fig. 1A compares the *comX* response to exogenous XIP in *S. mutans* UA159  
170 (wild-type) and  $\Delta comS$  deletion genetic backgrounds, as measured by the fluorescence  
171 of a *PcomX-gfp* plasmidal reporter. Cells were imaged while adhered within a  
172 microfluidic chamber and supplied with a constant flow of defined medium (FMC)  
173 containing synthetic XIP. Although both strains respond to exogenous XIP, the  $\Delta comS$   
174 strain consistently showed roughly 1.5-fold lower *PcomX* activity than the wild type, at  
175 all XIP concentrations. Even saturating concentrations of exogenous XIP did not induce  
176 *comX* to equivalent levels in the wild-type and  $\Delta comS$  strains. This result is similar to  
177 the roughly two-fold difference in XIP-induced transformability observed for the wild-type  
178 and  $\Delta comS$  strains in [20]. Fig. 1B shows that the threshold for *comX* response  
179 occurred at a roughly 2-fold lower XIP concentration in UA159 than in the  $\Delta comS$  strain.  
180 Therefore the deletion of *comS* both elevated the threshold for a response to  
181 extracellular XIP and reduced the overall response at saturation.



182           The deletion of *comS* also affected cell-to-cell variability (noise) in *comX*  
183 expression. Figs. 1C and 1D show that the histograms of reporter fluorescence differ in  
184 wild-type and  $\Delta comS$  cells. Wild type showed a generally broader (noisier) *comX*  
185 response than did  $\Delta comS$ . We quantified this difference by fitting the histograms to a  
186 gamma distribution  $\Gamma(n | a, b)$ , a two-parameter probability distribution that can be used  
187 to model cell-to-cell variability in  $n$ , the copy number for a bacterial protein [28]. In a  
188 simple physical model, the parameter  $a$  of the gamma distribution is related to the  
189 number of mRNAs produced during the cell division time, while  $b$  is related to the  
190 number of protein copies produced per mRNA transcript [29]. As shown in Fig. 1E and  
191 1F, the UA159 background has a roughly 2-fold higher value for parameter  $a$   
192 (transcription rate), while parameter  $b$  (translation) is similar for the two strains. As this  
193 difference persists even at XIP concentrations exceeding 1  $\mu\text{M}$ , these data demonstrate  
194 again that deletion of the native *comS* significantly affects *comX* expression, even when  
195 excess extracellular XIP is provided at concentrations that saturate the *comX* response.

196

### 197 **Fluid replacement did not alter induction of *comX* in a *comS* overexpressing** 198 **strain**

199           To test whether *comX* activation in complex growth media requires the  
200 accumulation of extracellular XIP, we tested the effect of fluid flow rate in *comS*  
201 overexpressing cells that were adhered in a microfluidic flow chamber. Cells carrying  
202 the 184*comS* overexpression plasmid had previously been observed to activate *comX*  
203 in defined medium lacking exogenous CSP or XIP [26]. We anticipated that in an  
204 experiment where the cells were immobilized and supplied with a continuous flow of

205 fresh medium (lacking XIP or CSP), high flow rates would remove extracellular,  
206 secreted XIP (or ComS), leading to diminished *comX* activity. We loaded 184*comS*  
207 *PcomX-rfp* cells, which carry both the *comS* overexpression plasmid and a plasmid-  
208 borne *PcomX-rfp* reporter, into four different microfluidic flow chambers. Chambers  
209 were supplied with fresh complex medium flowing at rates between 0.02 ml h<sup>-1</sup> and 1 ml  
210 h<sup>-1</sup>. These flow rates were sufficient to completely replace the growth medium within  
211 each chamber on time intervals ranging from 6 seconds to 10 minutes. We also studied  
212 (1) a *PcomX-rfp* reporter in a UA159 background (negative control), and (2) a 184*comS*  
213 overproducing strain that was lacking a start codon (ATG point-mutated to AAG) on its  
214 chromosomal *comS* (184*comS PcomX-rfp ΔcomS*).

215 Figs. 2A-2B show that the negative control (wild-type background) did not  
216 activate *PcomX*. However, the overexpression strain carrying the intact chromosomal  
217 copy of *comS* showed a highly heterogeneous response, indicating that a subpopulation  
218 of these cells strongly activated *comX* in the flowing complex medium. However, the  
219 rate of fluid flow had little effect on either the median or the variance in *comX*  
220 expression. Fig. 2B shows the fluorescence of the individual cells whose signal  
221 exceeded the maximum *PcomX* activity (roughly 14 fluorescence units) seen in the  
222 UA159 negative control. The median *comX* activity in the *comS*-overexpressing cells did  
223 not decline at the highest flow rates; instead it showed a weak increase, which was  
224 smaller than the cell-to-cell variability. These data show that overexpression of *comS*  
225 can allow *S. mutans* to activate *comX*, even in complex media where import of XIP is  
226 normally inhibited. The finding that this activation is unaffected by very rapid  
227 replacement of the medium implies that *comX* response in the *comS* overexpression

228 strain does not require extracellular XIP (or ComS) to accumulate in the medium.  
229 However this *comX* response does require a chromosomal copy of *comS*: Fig. 2B  
230 shows that very few  $\Delta comS$  cells activated *comX*, even though they harbored the *comS*  
231 overexpression plasmid. Together with Fig. 1, these data show that the chromosomal  
232 *comS* plays a role in *comX* activation that is not fully complemented either by saturating  
233 concentrations of exogenous XIP or by endogenous overproduction of ComS.

234

### 235 **Chromosomal *comS* increases the number of *comS* mRNA transcripts**

236 Figure 1 suggests that transcription from the native *comS* plays an important role in the  
237 response of the wild-type to exogenous XIP, while Figure 2 suggests that the native  
238 *comS* is essential to the self-activation of the ComS-overexpression strain. Therefore  
239 we used RT-qPCR to measure *comS* and *comX* transcript copy numbers in mid-  
240 exponential phase cultures of these strains. Strains were grown in complex medium  
241 (BHI) or defined medium (FMC)  $\pm$  synthetic XIP, and 16S rRNA was used as a control  
242 for normalization. The *comS* PCR (Fig. 3A) shows that exogenously added XIP  
243 significantly enhanced *comS* transcription in the wild type grown in defined medium,  
244 compared to controls lacking XIP or grown in complex medium. In addition, 184*comS*  
245 cells grown in complex medium displayed *comS* transcript levels that were significantly  
246 higher than in 184*comS*  $\Delta comS$ , and were similar to the XIP-supplemented wild type.  
247 As expected, the  $\Delta comS$  strain in defined medium showed only a baseline signal for  
248 transcription, whether or not XIP was provided. The *comX* transcript levels were low  
249 compared to *comS*, and spanned a smaller range overall, with a statistically significant  
250 enhancement only in the wild type grown with XIP (Fig. 3B). Overall these data verify

251 that addition of exogenous XIP (in defined medium) enhances *comS* transcription, and  
252 that the chromosomal copy of *comS* significantly boosts transcription even when ComS  
253 is overexpressed from a plasmid.

254

255 **Population density of *comS* overexpressing cells does not determine the *comX***  
256 **response**

257 To test whether *comS*-overexpressing cells release extracellular XIP that can  
258 activate *comX* in  $\Delta comS$  cells, we measured *comX* activation in co-cultures of 184*comS*  
259 *PcomX-rfp* (senders) and *PcomX-gfp*  $\Delta comS$  (receivers). We prepared cocultures by  
260 mixing sender (*comS* overexpressing) and receiver (*comS* deficient) cultures in different  
261 volume ratios. We loaded the cocultures into microfluidic chambers containing static,  
262 defined medium (FMC) without exogenous XIP. We anticipated that, if senders released  
263 XIP (or ComS) into the extracellular medium, both senders (RFP reporter) and receivers  
264 (GFP reporter) would respond by activating *comX*, and that the average activation  
265 would increase with the ratio of senders to receivers.

266 We analyzed the green and red fluorescence of the cocultures to generate  
267 histograms of individual cell fluorescence that reveal both the sender (red) and receiver  
268 (green) *comX* response, shown in Figs. 4A and 4B. Representative microscopy images  
269 are shown in Figs. 4C-4H. As expected, a control chamber containing only receiver cells  
270 showed enhanced GFP fluorescence but only baseline RFP fluorescence in response to  
271 50 nM exogenous XIP (second column in Fig. 4A, 4B, and Fig. 4D). Similarly, a control  
272 chamber containing only sender cells showed enhanced RFP fluorescence but only  
273 baseline GFP fluorescence (rightmost column in Figs. 4A, 4B, and Fig. 4H). When

274 exogenous XIP was not provided, the GFP fluorescence of cocultures showed no  
275 systematic increase with the sender/receiver ratio, over a four-hour period. The GFP  
276 fluorescence histograms remained at the baseline level of the negative control ( $\Delta comS$   
277 strain alone) in the first column of Fig. 4A. Further, the GFP response of the cocultures  
278 did not change appreciably over a period of four hours (Supplemental Fig. S1). Even  
279 when present in abundance, senders did not activate *comX* in the  $\Delta comS$  receivers.

280 By contrast, the median RFP fluorescence of the co-cultures (Fig. 4B, 4F-4H) did  
281 increase at high sender/receiver ratios. The median RFP fluorescence of cells in the  
282 coculture increased approximately in proportion to the density of senders, as expected if  
283 each sender activated its own *comX*. RFP fluorescence was constant over a period of  
284 four hours (Supplemental Fig. S1). These data show that although overexpression of  
285 *comS* stimulates *comX* within individual cells, this activation does not cause  
286 extracellular, diffusible XIP to accumulate at levels that are capable of activating nearby  
287  $\Delta comS$  cells.

288

### 289 **Growth phase-dependent release of XIP**

290 We previously showed that intercellular signaling by *S. mutans* ComRS is  
291 impeded by deletion of the *atlA* gene, encoding a major autolysin. Loss of AtlA inhibits  
292 cell lysis, which appears to occur primarily in stationary phase [26]. We therefore tested  
293 whether signaling from a sender (*comS* overexpressing) strain to a receiver ( $\Delta comS$ )  
294 strain is enhanced in the latter phases of growth. We prepared sender/receiver co-  
295 cultures in different ratios in defined medium. Every 2 h the pH of the cultures was  
296 adjusted to 7.0 by addition of 2 N NaOH, the OD<sub>600</sub> was recorded, and an aliquot of the

297 culture was collected for fluorescence imaging of the *comX* promoter activity. Low pH  
298 suppresses the *comX* response, so the pH adjustment ensures that cells are able to  
299 respond to *comX*-activating signals when present [9, 13]. The GFP fluorescence  
300 histograms of Fig. 5A show that *comX* expression in the  $\Delta comS$  strain is slightly higher  
301 at 12 h than at 2 h or 8 h. This increase was more pronounced at higher ratios of sender  
302 to receiver cells, consistent with increased release of XIP from the senders in late  
303 growth. The histograms of Fig. 5B show a strong RFP response (due to senders) as in  
304 Fig. 4B, with a slightly stronger response at earlier times.

305         The median GFP and RFP signals in the above histograms do not shift  
306 dramatically with either time or co-culture ratio. However the histograms in Fig. 5A  
307 suggest moderate, density-dependent increases in receiver (green) fluorescence at  
308 12 h. Figs. 5C and 5D highlight these changes by showing the value of the 99<sup>th</sup>  
309 percentile of red and green fluorescence respectively in the culture, versus optical  
310 density. In Fig. 5C the response of the most active receivers increases slightly at higher  
311 OD<sub>600</sub> values, a change that is slightly more pronounced at higher sender:receiver  
312 ratios. By contrast Fig. 5D shows no strong trend in the fluorescence of the 99<sup>th</sup>  
313 percentile of senders, versus OD<sub>600</sub>. None of the cocultures exhibited as strong a GFP  
314 response as the positive control (receiver + 50 nM exogenous XIP, Fig. 5C), indicating  
315 that even after 12 h extracellular XIP had not accumulated to the level used for the  
316 positive control. Overall these data are consistent with a robust autoactivation of the

317 *comS* overexpressing senders, accompanied by some release of XIP (or ComS) to the  
318 extracellular medium in the late stages of growth.

319

### 320 **Fluorescence polarization shows binding of ComR to *comS* and *comX* promoters**

321 The observation of *comX* activation in the overexpressing (sender) strain, without  
322 significant accumulation of XIP in the extracellular medium, implies that activation of  
323 *comX* does not require export and reimport of XIP or ComS, if the chromosomal copy of  
324 *comS* is intact. To test whether ComS could serve as an intracellular signal to activate  
325 *comX*, we tested whether unprocessed ComS and ComR bind specifically to the *comS*  
326 and *comX* promoters *in vitro*. We performed a fluorescence polarization assay, using  
327 purified recombinant ComR, synthetic XIP or ComS, and a fluorescently labeled DNA  
328 oligomer corresponding to the *S. mutans comX* promoter region containing the ComR  
329 binding site. Fig. 6A shows the fluorescence polarization versus ComR concentration,  
330 both in the presence and absence of excess (10  $\mu$ M) ComS or XIP. Because of the  
331 excess of peptide (10  $\mu$ M) relative to fluorescent probe (1 nM), the probe polarization  
332 depends primarily on the concentration of ComR added. In the absence of XIP or  
333 ComS, ComR caused a weak rise in the fluorescence polarization of the DNA oligomer,  
334 indicating poor binding affinity, as has been observed for several *Streptococcus* species  
335 [19]. However, in the presence of ComS or XIP the binding isotherm saturated at  
336 moderate ComR concentrations, indicating formation of a complex with higher affinity  
337 for the *comX* promoter. Histidine tagging of ComR was found to reduce this affinity, as  
338 shown in Supplemental Fig. S2.

339 Fig. 6B shows a competition assay in which unlabeled ('cold') *PcomX* and  
340 *PcomS* DNA oligomers (which differ by three base pairs) having the same stem-loop  
341 structure as the labeled probe were titrated into samples containing 1.5  $\mu\text{M}$  ComR, 10  
342  $\mu\text{M}$  ComS or XIP, and the labeled DNA (1 nM). The systematic decrease in polarization  
343 is consistent with competition for ComR. The unlabeled *PcomS* and *PcomX* probes  
344 appear to have identical affinity for ComR.

345 Fig. 6A indicates that ComS interacts with ComR and the DNA probe, although  
346 with weaker affinity than XIP. It also shows that at saturating ComR, inclusion of ComS  
347 produces approximately half of the total fluorescence polarization that is elicited by an  
348 equivalent concentration of XIP. As the fluorescent probe is present at very low  
349 concentration, this difference may suggest that ComS and XIP induce a qualitatively  
350 different interaction between the ComR/peptide complex and the DNA probe. The solid  
351 curves in Fig. 6A and 6B are calculated from a two-step, cooperative binding model  
352 (*Methods*) in which the dissociation constants for the ComR/peptide complex ( $k_1$ ) and  
353 the complex/promoter ( $k_2$ ), as well as the order of multimerization  $n$  of the  
354 ComR/peptide complex, are variables. As discussed in *Methods*, the data are consistent  
355 with a range of values for these parameters, but generally we obtain micromolar values  
356 for  $k_1$  and nanomolar  $k_2$  for both ComS and XIP, and similar cooperativity  $n$  for both  
357 peptides. The curves in the figure show the model with a roughly two fold difference in  
358 the ComR dissociation constants for ComS ( $k_1 = 3.2 \mu\text{M}$ ,  $n = 2.5$ ) and XIP ( $k_1 = 7.3 \mu\text{M}$ ,  
359  $n = 2.4$ ). Although the data clearly indicate that both ComS and XIP interact with ComR  
360 to bind the DNA probe, they do not permit a precise determination of the ComS and XIP  
361 interaction parameters.



362

363 **Data are consistent with an intracellular feedback loop in *comS* transcription**

364         The different behavior of the wild-type and *comS* deletion strains in Fig. 1A and  
365 the effect of *comS* deletion in Fig. 2A show that transcription from an intact *comS* under  
366 native control has an effect on *comX* expression that cannot be duplicated either by  
367 exogenous XIP or by a ComS overexpression plasmid. One such effect could be  
368 transcriptional positive feedback in which the chromosomal copy of *comS* produces  
369 ComS that is retained in the cell and stimulates a high level of *comS* transcription, more  
370 than is achieved with a ComS overexpression plasmid alone. Import of extracellular XIP  
371 would likely stimulate such a feedback mechanism. The resulting enhanced intracellular  
372 levels of ComS, if they activate *comX* efficiently, could account for the important role of  
373 natural control of *comS* and the lack of evidence for XIP release by *comX*-active cells.  
374 The feedback mechanism, including the interplay between imported XIP and the  
375 chromosomal *comS*, is illustrated in Fig. 7A.

376         A mathematical model of this mechanism is tested in Fig. 7B. The model, which  
377 is further described in the Supplemental Information, assumes that (1) ComR can form  
378 a complex with either ComS or XIP; (2) extracellular XIP is able to enter the cell (in  
379 defined growth medium); (3) neither ComS nor XIP is exported, although endogenously  
380 produced ComS may be converted to XIP. Motivated by the differences in the saturated  
381 fluorescence polarization with ComS and XIP, the model further assumes that the order  
382 of multimerization in the ComR/peptide complex that binds DNA is  $n = 1$  (ComS) or  $n =$   
383  $2$  (XIP) (see *Discussion*). Finally, the maximal rate of transcription (ComX production)

384 was allowed to depend on whether a ComR/XIP or a ComR/ComS complex was bound  
385 to the promoter.

386 The steady states of the dynamical system are found from the nullclines of the  
387 differential equations of the model (*Methods*). We found that if the ComR/XIP and  
388 ComR/ComS complexes are permitted to give different maximal transcription rates, the  
389 model reproduces the different *comX* expression in the  $\Delta comS$  and wild-type  
390 backgrounds in Fig. 1A. Further, if only XIP (but not full-length ComS) interacts with  
391 ComR to activate *comX*, the model fails to reproduce the Fig. 1A data, giving instead  
392 identical *comX* activation in both the  $\Delta comS$  and wild-type backgrounds. Parameter  
393 values for the best fit and 90<sup>th</sup> and 10<sup>th</sup> percentiles of a bootstrap uncertainty analysis  
394 are reported in Supporting Information Table S2. Parameters were found to preserve  
395 the relative orders of magnitude of the dissociation constants of the transcriptional  
396 activators found in Fig. 6, with the best fit giving a transcription rate that is between 4-  
397 fold and 200-fold greater for the ComS-ComR bound promoter than for XIP-ComR  
398 activation of the gene.

399

400

## Discussion

401 The ComRS system found in mutants, salivarius, pyogenic and bovis streptococci  
402 has been described as a quorum sensing system [20] or a timing mechanism [25] that  
403 directly controls *comX*, the master regulator of genetic competence. The ComS-derived  
404 peptide XIP is readily imported by *S. mutans* in defined growth medium, where it  
405 induces transformability with high efficiency. Some of the key evidence supporting an  
406 intercellular signaling role for XIP include the detection by LC-MS/MS spectroscopy of

407 XIP in supernatants of *S. mutans* that were grown to high cell densities [22, 23]. In  
408 addition, filtrates of *S. mutans* cultures grown to high density induced P*comX* activity in  
409 reporter strains [21], indicating the presence of an active competence signal in the  
410 extracellular medium. A recent co-culture study verified that XIP is freely diffusible in  
411 aqueous media and showed that ComS-overexpressing senders are able to activate  
412 *comX* in nearby  $\Delta$ *comS* receiver mutants, with no cell:cell contact being required [26].  
413 However, deletion of *atlA*, which encodes a surface-localized protein associated with  
414 envelope biogenesis and autolysis [30], suppressed this intercellular signaling [26].  
415 Taken together these data indicate that the *S. mutans* ComRS system provides  
416 intercellular competence signaling when autolysis releases sufficient concentrations of  
417 ComS or XIP.

418         Our data provide several lines of evidence that ComRS can also control *comX*  
419 without the accumulation and import of extracellular XIP or ComS. First, although the  
420 response of *comX* is different in complex medium supplemented with CSP than in  
421 defined medium supplemented with XIP, in both cases the behavior of *comX* is affected  
422 by the presence of an intact chromosomal copy of *comS* under the control of its cognate  
423 promoter. In complex medium, *comS* is required in order for CSP to elicit any *comX*  
424 response; in defined media the deletion of *comS* reduces the *comX* response (both  
425 average and variance) to exogenous XIP, and raises the threshold XIP concentration for  
426 a response. Further, we find that even if it harbors a *comS* overexpression plasmid, a  
427 *comS* deletion strain expresses *comX* much more weakly than does a *comS*-  
428 overexpressing strain that retains its chromosomal *comS*. These data show that the

429 cell's own native regulation of *comS* affects its activation of *comX*, independent of  
430 whether it overproduces ComS from a plasmid or imports exogenous XIP via OppA.

431 Our data also show that even in complex growth medium, which is known to  
432 inhibit the uptake of extracellular XIP, ComS-overexpressing (sender) cells activate their  
433 own *comX*. This autoactivation is unaffected by very rapid exchange or flow of the  
434 medium, strongly suggesting that *comX* activation in these cells does not require  
435 accumulation and import of XIP. However this autoactivation requires a native *comS* in  
436 addition to the overexpression plasmid. These behaviors are consistent with an  
437 intracellular positive feedback loop in which *comS* stimulates its own expression through  
438 its cognate promoter, enabling the cell to autoactivate *comX* or enhancing its sensitivity  
439 to extracellular XIP.

440 Finally the data show that *comS*-overexpressing cells fail to stimulate  $\Delta comS$   
441 cells (receivers) in co-cultures in defined medium, where XIP should be efficiently  
442 imported. As the  $\Delta comS$  receivers do respond to exogenously added XIP, these data  
443 indicate that the overexpressing cells activate their own *comX* without releasing  
444 significant XIP to the medium. The weak intercellular signaling that is observed in  
445 cocultures grown to late growth phases is consistent with eventual lysis of sender cells,  
446 possibly linked to autoactivation of the lytic pathway driven by ComX and ComDE.

447 The finding that diffusive signaling by ComS or XIP between *S. mutans* cells is  
448 inefficient or lacks spatial range is consistent with the conclusion reached by Gardan *et*  
449 *al.* using *S. thermophilus*. Those authors found that the type I ComS peptide of *S.*  
450 *thermophilus* was not secreted at detectable levels in a strain that produced it naturally,  
451 although an overproducing strain did generate detectable ComS in the medium [25].

452 They argued that ComS does not diffuse through or accumulate in the medium,  
453 although it may be able to signal between cells that are in physical contact. This  
454 proximity model for ComS resembles a “self-sensing” quorum system [31] in which the  
455 secreted signal is retained at elevated concentrations in the immediate surroundings of  
456 the cell, possibly associated with the cell surface, so that the cell responds somewhat  
457 more strongly to its own secreted signal than to that of the rest of the population.

458 Our observations suggest more strongly that export or import of ComS or XIP is  
459 not essential to ComRS control of *comX* in *S. mutans*, under the conditions examined.  
460 The key role of native control of *comS* in our data argues that the more essential  
461 component is the dynamics of the cell’s own *comS* transcription. If cells do not export  
462 endogenously produced ComS or XIP in the absence of lysis, then ComS or XIP would  
463 be available within the cells to activate *PcomS* and drive positive feedback in *comS*,  
464 leading to strong *PcomX* activation. We have previously argued that the bimodal  
465 response of *S. mutans* to CSP stimulation, which requires *comS* but not *opp*, suggests  
466 that CSP stimulates a noisy, intracellular autofeedback loop of this type. If CSP/ComDE  
467 can, through its as-yet-unknown pathway, facilitate *comS* transcriptional feedback, then  
468 *comX* expression may occur in at least some cells, leading to the observed bimodal  
469 distribution of *comX* activity in a population [11]. Notably the overexpression of *comS* in  
470 our study also leads to heterogeneous *comX* activity, suggesting that it plays a role  
471 similar to exogenous CSP by facilitating *comS* autofeedback. Transcriptional feedback  
472 loops generate heterogeneous, bimodal behaviors at the single-cell level in many other  
473 bacterial systems, including competence regulatory pathways. In the regulation of

474 *Bacillus subtilis* competence, an intracellular feedback loop based on ComK activates a  
475 subpopulation of cells into the competent state [32].

476 In the case of *S. mutans*, where it is unknown whether ComS is processed to XIP  
477 inside the cell, either XIP or ComS could potentially act as the intracellular feedback  
478 signal. Although *S. mutans* competence was shown to be unresponsive to exogenous  
479 full-length ComS [20], this finding may reflect either selectivity by ComR or simply  
480 inefficient import of full length ComS by Opp. ComS is significantly larger (17 residues)  
481 than peptides that are typically transported by ABC transporters. Shanker *et. al.* found  
482 that *S. mutans* ComR is unresponsive to the ComS peptides produced by other  
483 streptococcal species [33], although an eight residue XIP (ComS<sub>10-17</sub>) did interact  
484 effectively with ComR to bind the *comS* and *comX* promoters [19]. Our fluorescence  
485 polarization assay confirms that both ComS and XIP can interact with ComR to bind the  
486 *comX* and *comS* promoter regions. They also suggest that ComS and XIP may form  
487 ComR complexes of different degrees of multimerization, a difference that could have  
488 interesting consequences for the nonlinear dynamics of feedback regulation. Our  
489 mathematical model for transcriptional autofeedback in the *comRS* system incorporates  
490 the data by assuming that endogenously produced ComS is not released to the  
491 environment, although extracellular XIP is imported and supplements the endogenous  
492 ComS in interacting with ComR. Therefore, the ComS and XIP complexes of ComR  
493 may together drive expression of both *comS* and *comX*.

494 Further work will be needed to verify whether intracellular ComS and XIP can  
495 both activate *comX* by modulating ComR binding. Structural studies in *S. pyogenes*  
496 have shown that some intracellular RGG receptor proteins can bind pheromones that

497 differ in length and sequence [34]. Crystallographic structures of homologous ComR  
498 proteins [33, 35] show the SHP binding pocket of the ComR C-terminus to fall in the  
499 tetratricopeptide repeat domain that is responsible for multimerization, while the N-  
500 terminus helix-turn-helix structure binds DNA after an induced structural rearrangement.  
501 The location of the SHP binding pocket could allow the longer ComS to hinder  
502 multimerization when bound, resulting in a monomer binding to its target, while the XIP  
503 does not. Supplemental Fig. S2 shows preliminary evidence that the ComS N-terminus  
504 affects ComR binding in *S. mutans*. Neither ComS nor XIP could induce DNA binding by  
505 an N-terminally 6x histidine tagged ComR, whereas XIP (but not ComS) caused DNA  
506 binding activity in a C-terminally tagged ComR. These data indicate that steric effects  
507 around the SHP binding pocket may influence DNA binding affinities.

508         Positive feedback occurs in many quorum sensing systems as the accumulation  
509 of the chemical signal in the extracellular environment stimulates the cell to produce  
510 additional signal or its cognate receptor. For example in *Vibrio fischeri* the C8  
511 homoserine lactone autoinducer stimulates expression of *ainS*, which encodes the  
512 autoinducer synthase [36]. In *Vibrio cholerae* the CAI-1 signal stimulates production of  
513 its receptor CqsS [37]. In these cases the extracellular signal concentration, which is the  
514 positive feedback signal, is sensed by large numbers of cells, and so the population  
515 responds homogenously. However if an individual cell responds preferentially to its own  
516 signal production then the feedback signal is specific to the individual cell and the  
517 behavior is qualitatively different. Individual feedback can convert a graded (or  
518 unimodal) population response to a switched or bimodal response [38]. Depending on  
519 parameters such as the rate of signal production, noise levels or the cell density, the

520 response of the cells may then span a range from strongly social or quorum behavior to  
521 purely autocrine or self-sensing [31] behavior in which cells respond independently and  
522 the population becomes heterogeneous [39]. Synthetic biology has exploited this  
523 phenomenon in several bacterial quorum sensing systems to amplify the cell's  
524 sensitivity to an exogenous signal. This can lower the quorum circuit's threshold  
525 sensitivity to the signal, and it can also enhance the amplitude of the cell's full response  
526 to that signal. Fig. 1A and 1B suggest that the chromosomal *comS* in *S. mutans* roughly  
527 doubles the amplitude of *comX* response and lowers the XIP sensitivity threshold  
528 roughly two fold. This amplification is comparable to what was accomplished in  
529 engineered, synthetic systems [40, 41].

530 As a result the ComRS system may have two modes of function in *S. mutans*. At  
531 low population densities, during early growth, ComRS operates through intracellular  
532 feedback, leading to population bimodality in *comX* expression. Here only a small  
533 subpopulation of cells activate the late competence genes. However, in later growth  
534 phases or in mature biofilms, stress mechanisms that drive autolysis allow the release  
535 of XIP, providing a diffusible signal that is detected by other cells and amplified through  
536 the internal feedback mechanism to elicit a strong competence response. In this sense  
537 XIP may serve to broadcast localized stress conditions, stimulating *S. mutans* to  
538 scavenge DNA resources opportunistically from nearby lysing cells [42, 43].

539

## 540 **Materials and methods**

### 541 **Strains and growth conditions**



542 *S. mutans* wild type strain UA159 and mutant reporting/gene deletion strains  
543 from glycerol freezer stock were grown in BBL BHI (Becton, Dickinson and co.) at 37°C  
544 in 5% CO<sub>2</sub> overnight. Antibiotics were used at the following concentrations where  
545 resistance is indicated in Table 1: erythromycin (10 µg ml<sup>-1</sup>), kanamycin (1 mg ml<sup>-1</sup>),  
546 spectinomycin (1 mg ml<sup>-1</sup>). For experiments in defined medium, strains were washed  
547 twice by centrifugation, removal of supernatant and re-suspension in the defined  
548 medium FMC [44]. These were then diluted 20-fold into fresh FMC and allowed to grow  
549 in the same incubator conditions until at optical density at 600 nm (OD<sub>600</sub>) of 0.1.  
550 Synthetic XIP (sequence GLDWWSL) was synthesized and purified to 98% purity by  
551 NeoBioSci (Cambridge, MA).

552 *E. coli* strains were grown in LB at 37 °C shaking in an aerobic incubator  
553 overnight. Antibiotics were used at the following concentrations where resistance is  
554 indicated: ampicillin (10 µg ml<sup>-1</sup>). The next day the overnight cultures were diluted 100-  
555 fold into LB containing ampicillin at the indicated concentration and grown under the  
556 same incubator conditions as overnight.

557

## 558 **Mutant strains used**

559 Table 1: list of strains and plasmids used.

| Strain or plasmid               | Characteristics*                                      | Source or reference |
|---------------------------------|-------------------------------------------------------|---------------------|
| <b><i>S. mutans</i> strains</b> |                                                       |                     |
| P <i>comX</i> GFP               | UA159 harboring P <i>comX</i><br>GFP promoter fusion. | [11]                |

|                                                |                                                                                                                                                     |                         |
|------------------------------------------------|-----------------------------------------------------------------------------------------------------------------------------------------------------|-------------------------|
| <i>PcomX</i> RFP                               | UA159 harboring <i>PcomX</i> dsRed RFP promoter fusion.                                                                                             | [26]                    |
| <i>PcomX</i> GFP $\Delta comS$                 | UA159 <i>comS</i> gene replaced with a non-polar erythromycin resistance cassette. Harboring <i>PcomX</i> GFP promoter fusion.                      | [11]                    |
| 184 <i>comS</i> <i>PcomX</i> RFP               | UA159 harboring pIB184 <i>comS</i> and <i>PcomX</i> dsRed RFP promoter fusion.                                                                      | [26]                    |
| 184 <i>comS</i> <i>PcomX</i> RFP $\Delta comS$ | UA159 harboring pIB184 <i>comS</i> and <i>PcomX</i> dsRed RFP promoter fusion. <i>comS</i> disrupted by point mutation in start codon (ATG to AAG). | This study.             |
| <b><i>E. coli</i> strains</b>                  |                                                                                                                                                     |                         |
| BL21(DE3)                                      | Used for recombinant protein expression                                                                                                             | New England Biolabs, MA |

|                                            |                                                                                                                                    |                         |
|--------------------------------------------|------------------------------------------------------------------------------------------------------------------------------------|-------------------------|
| 10-beta                                    | Used for propagating plasmids during cloning                                                                                       | New England Biolabs, MA |
|                                            |                                                                                                                                    |                         |
| Plasmids                                   |                                                                                                                                    |                         |
| pIB184                                     | Shuttle expression plasmid with the P23 constitutive promoter, Em <sup>R</sup>                                                     | [45]                    |
| pDL278                                     | <i>E. coli</i> – <i>Streptococcus</i> shuttle vector, Sp <sup>R</sup>                                                              | [46]                    |
| pET45b(+) <i>his-comR</i> <sub>UA159</sub> | pET45b(+) derivative containing the translational fusion P <sub>T7lac</sub> -6 <i>xhis-comR</i> <sub>UA159</sub> , Ap <sup>r</sup> | This study              |

560 \*Em = erythromycin, Sp = spectinomycin, Ap = ampicillin.

## 561 **Construction of mutant strains**

### 562 *ΔcomS* point mutant

563 The start codon of the *comS* gene was mutated from ATG to AAG. The mutation was  
564 introduced directly into the chromosome by site-directed mutagenesis using a PCR  
565 product generated by overlap extension PCR [47]. Potential mutants were screened  
566 using mismatch amplification mutation analysis (MAMA) PCR [48], as previously  
567 described [49, 50]. The point mutation was confirmed by PCR and sequencing to  
568 ensure that no further mutations were introduced into the *comS* gene and its flanking  
569 regions.

570 His-ComR expressing *E. coli*

571 The *comR* gene (SMu.61) was amplified using gene-specific primers (forward,  
572 AAAGAATCCTATGTTAAAAGA; reverse, CACCCTAGGAGACCCATCAAA) and cloned  
573 into the pET45b(+) vector bearing an N-terminal 6xHis tag. The resulting vector,  
574 pET45b(+)his-comR<sub>UA159</sub>, was transformed into *E. coli* 10-beta. After sequencing  
575 confirmed the correct insertion (using T7 promoter and T7 terminator primers), the  
576 vector was transformed into *E. coli* BL21(DE3) prior to protein purification.

577 **Microfluidic experiments**

578 Microfluidic experiments were performed using a seven-channel PDMS-cast  
579 mixing array device as described previously [11, 51]. Cells grown to OD<sub>600</sub> 0.1 from  
580 dilution in FMC were sonicated briefly using a Fisher Scientific FB120 sonic  
581 dismembrator probe to split large chains. Sonicated cells were then loaded into the  
582 device through a syringe capped with a 5 µm filter to remove any remaining  
583 aggregations. FMC containing 1 mg ml<sup>-1</sup> spectinomycin and a XIP gradient produced  
584 from three inlets containing different concentrations of XIP (0 nM, 600 nM and 6 µM XIP  
585 inlets) passed through a mixing matrix was pumped through the cell chambers at a  
586 steady rate of 0.08 ml/hr to create a constant, different XIP concentration in each cell  
587 chamber. Flow stability and XIP concentration were inferred using a fluorescent red dye  
588 (sulforhodamine 101, Acros Organics) mixed into the inlet medium in proportion to XIP  
589 concentration (i.e. none in 0nM XIP inlet, and 10x the concentration of sulforhodamine  
590 in the high XIP inlet as in the middle inlet). This allowed calculation of XIP concentration  
591 by measurement of a given channel's red fluorescence relative to the red fluorescence  
592 of the channels with known concentration.

593 Phase contrast and green fluorescence pictures of reporting cells were collected  
594 using a Nikon TE2000U inverted microscope (equipped with a 40x objective, CFI Plan  
595 Fluor DLL, NA 0.5, Nikon) and a CCD camera (CoolSNAP HQ2, Photometrics) with a  
596 green fluorescence filter (Nikon C-FL GFP HC HISN zero shift filter cube) excited by a  
597 mercury lamp source (Intensilight C-HGFI, Nikon). Images were taken at 0, 30 and 90  
598 minutes after cell exposure to XIP commenced. Images were analyzed according to the  
599 method described previously [52] with fitting performed in Matlab® (The Mathworks  
600 inc.). A red fluorescence filter (C-FL Y-2E/C dsRed Filter Cube, Nikon) was used to  
601 visualize sulforhodamine concentration in the channels.

602 Gamma distributions (a two-parameter probability distribution describing the  
603 amount of protein produced in sequential transcription and translation steps) were fit to  
604 the single cell fluorescence distributions using Matlab to fit protein production to  
605 theoretical description [29]. The fit was applied to cells fluorescing above an arbitrary  
606 cutoff of 40 units (around background) in order to prevent turned-off cells from skewing  
607 the distribution. Parameters were rounded to three significant figures and reported in  
608 Table S1 (see supporting information).

### 609 **Flow rate dependence experiment**

610 In order to measure the flow rate dependence of XIP signaling we loaded cells  
611 into a commercial six-channel microfluidic slide (IBIDI  $\mu$ -slide VI, IBIDI GmbH). The six  
612 channels contained respectively (1) a red fluorescent protein (dsRed) *comX* reporting  
613 strain (*PcomX* RFP) control channel flowing fresh BHI at  $0.1 \text{ ml h}^{-1}$ ; (2)-(5) four channels  
614 containing a *comS* overexpression strain 184*comS* *PcomX* RFP (*comS* on plasmid  
615 pIB184 under the strong constitutive P23 promoter) with BHI at different flow rates

616 ranging from 0.02 ml h<sup>-1</sup> up to 1ml h<sup>-1</sup>, and (6) a 184*comS* *PcomX* RFP strain with a  
617 point mutation disrupting the chromosomal *comS* gene ( $\Delta comS$ ) under flow at 0.1 ml h<sup>-1</sup>  
618 <sup>1</sup>. After 2 hours the plain BHI supplied was replaced with BHI supplemented with 50  $\mu$ g  
619 ml<sup>-1</sup> chloramphenicol in order to halt further translation and allow any RFP in the cells to  
620 fold. This was supplied at 0.1 ml h<sup>-1</sup> flow rate for all channels. Four hours (the  
621 maturation time of our RFP) after chloramphenicol addition final fluorescence images of  
622 the cultures were taken. Due to the bimodal *comX* activation in BHI, a fluorescence  
623 cutoff was set as the maximum RFP fluorescence observed in the *PcomX* RFP negative  
624 control. Cells exhibiting RFP fluorescence above this level were collected in an array  
625 and the size of this sample as a percentage of the population as well as the median of  
626 the above-cutoff fluorescence reported.

### 627 **Channel co-culture experiment**

628 We loaded co-cultures of a *PcomX* GFP  $\Delta comS$  (responders) with the *comS*  
629 overexpressing strain 184*comS* *PcomX* RFP (senders) into two commercial microfluidic  
630 slides (IBIDI  $\mu$ -slide VI) using static (not flowing) FMC medium and varying ratios of  
631 *comS* overproducers: $\Delta comS$  responders (percentage by volume of OD<sub>600</sub> 0.1 cultures  
632 vortexed together). *PcomX* RFP, *PcomX* GFP  $\Delta comS$ , *PcomX* RFP + 50 nM XIP and  
633 *PcomX* GFP  $\Delta comS$  + 50 nM XIP were used as controls. The end ports of the channels  
634 were sealed with mineral oil to prevent drying of the medium in the channels. Images  
635 were taken as in the microfluidic experiments and analysis performed similarly. In the  
636 case of controls XIP was added to planktonic culture and the tube vortexed before  
637 pipetting into the slide. Because the population was heterogeneous in both fluorescent  
638 reporter type and *comX* expression, a fluorescence threshold was defined as the

639 maximum RFP fluorescence observed in the PcomX RFP negative control as  
640 previously. The median of the RFP fluorescence observed above this cutoff in other  
641 samples was used as a measure of how strongly the red cells were activating *comX* as  
642 a function of their number density.

### 643 **OD dependence of co-culture response**

644 For tests of growth-phase dependence of signaling, co-cultures similar to those in  
645 microfluidic channel slides were prepared. Overnight cultures were washed and diluted  
646 40x into fresh FMC containing erythromycin (10  $\mu\text{g ml}^{-1}$ ) and spectinomycin (1  $\text{mg ml}^{-1}$ ).  
647 Once grown to OD<sub>600</sub> 0.05, these were mixed in ratios varying from 0% *comS*  
648 overexpressers to 100% overexpressers, defined by volume of *comS* overproducers  
649 added divided by the volume of the  $\Delta\text{comS}$  culture added. Low initial cell densities were  
650 used to ensure that early, mid and late growth phases were probed for XIP release.  
651 Every two hours the OD<sub>600</sub> of the culture and its pH were measured. The pH was  
652 corrected back to 7.0 using 2N sodium hydroxide if it had deviated below 6.5, in order to  
653 measure reaction to any XIP released at late times into the culture. RFP and GFP  
654 fluorescence were measured by pipetting a small amount of the culture onto a glass  
655 coverslip and analyzing single cells. 99<sup>th</sup> percentile GFP fluorescence was then used to  
656 determine if XIP was being released to the *comS* mutants in an OD<sub>600</sub>-dependent  
657 manner.

658

### 659 **RT-qPCR measurement of *comS* and *comX* transcripts**

660 *S. mutans* cells were diluted 20-fold into BHI (P*comX-gfp* WT/BHI, 184*comS* P*comX*-  
661 *rfp*, 184*comS* P*comX-rfp*  $\Delta\text{comS}$  samples) or FMC (P*comX-gfp* WT/FMC  $\pm$  XIP,

662 *PcomX*-gfp  $\Delta$ *comS*  $\pm$  XIP samples). Where added, XIP was supplied at OD<sub>600</sub> = 0.1.  
663 Cells were harvested at OD<sub>600</sub> = 0.5 by centrifugation and re-suspended in RNA  
664 protectant buffer for 10 minutes. Samples were then centrifuged, the supernatant  
665 removed and the pellets frozen at -80 °C. RNA extraction was performed using the  
666 Qiagen RNEasy mini kit (Qiagen, USA). RNA sample concentration and purity were  
667 measured using a Thermo Scientific NanoDrop One Microvolume UV-Vis  
668 Spectrophotometer (Thermo Scientific, USA). 1  $\mu$ g of RNA was then reverse transcribed  
669 to cDNA using the Bio-Rad iScript reverse transcription kit with random primers (Bio-  
670 Rad, USA). The qPCR was performed on a Bio-Rad CFX96 Real-Time System using  
671 Bio-Rad Sso Advanced Universal SYBR Green Supermix with a 50-fold dilution of the  
672 cDNA and 500 nM gene-specific primers. Sequences used for the primers are given in  
673 Table S3 (supplemental information). A standard curve across 8 orders of magnitude of  
674 transcript copies (from 10<sup>8</sup> to 10<sup>1</sup>) was used to determine transcript count for each gene.  
675  
676 For each sample the *comX* and *comS* transcript counts were normalized by the 16S  
677 rRNA count for the same sample. The results show the median of this ratio, with error  
678 bars indicating the range from the second lowest to second highest value among the  
679 multiple replicates that were performed for each condition. Nine replicates (3 biological  
680  $\times$  3 technical) were obtained for each condition, with the exception of the UA159  
681 background + XIP; for that condition RNA was successfully measured in only six  
682 replicates (2 biological  $\times$  3 technical).

683

684 **Fluorescence polarization**



685 For fluorescence polarization studies of promoter binding, the *comR* gene was  
686 cloned into the 6x-His tagged site on pET-45b(+) vector in *E. coli* 10-beta using  
687 standard PCR cloning methods. His-ComR was then expressed in *E. coli* BL21(DE3) by  
688 induction with 1mM IPTG at mid-exponential phase in LB. After 4 hours cells were lysed  
689 using lysozyme in B-PER lysis buffer (ThermoFisher). Protein was then purified from  
690 clarified lysate using Ni-NTA agarose affinity chromatography and the histidine tag  
691 cleaved using enterokinase max at 4°C (EKMax, Invitrogen). The resulting protein  
692 solution was dialyzed into PBS pH 7.4 for experimental use. Native ComR concentration  
693 was measured by the Pierce BCA assay (Thermo Scientific) and purity of the cleaved  
694 form verified by SDS-PAGE run against an uncleaved sample.

695 Fluorescence polarization (FP) assays were performed in a 96-well plate with  
696 black bottom and black sides in a Biotek Synergy 2 plate reader (Biotek Instruments  
697 inc.) in the polarization mode. A 5' Bodipy FL-X labeled self-annealing stem-loop DNA  
698 strand with sequence corresponding to *PcomX* (sequence 5'-BODIPY FL-X -  
699 ATGGGACATTTATGTCCTGTCCCCACAGGACATAAATGTCCCAT - 3'), synthesized  
700 by ThermoFisher) was used as the binding aptamer and a filter set with excitation 485  
701 nm, emission 528 nm was used for fluorescence excitation. 1 nM labeled DNA probe  
702 was added to a reaction buffer previously described [47] supplemented with 1 mM  
703 EDTA and 0.05 mg ml<sup>-1</sup> salmon sperm DNA. ComR was titrated in concentration in this  
704 buffer alone, in the presence of 10 µM XIP or in the presence of 10 µM comS. The  
705 reactions were incubated at 37°C for 20 minutes before reading. Synthetic ComS  
706 (sequence MFSILTSILMGLDWWSL) for fluorescence polarization was synthesized and  
707 purified to 60% purity by Biomatik (Wilmington, DE).

708 FP assays of competition by unlabeled DNA probes were performed with 1.5  $\mu\text{M}$   
709 ComR in the same buffer as above, with 1 nM *PcomX* fluorescent DNA, 0.05 mg ml<sup>-1</sup>  
710 salmon sperm DNA and 10  $\mu\text{M}$  SHP (either ComS or XIP). An unlabeled probe  
711 corresponding to either the *PcomS* (sequence 5' - ACG  
712 GGACATAAATGTCCTGTCCCCCACAGGACATTTATGTCCCGT - 3'), synthesized by  
713 Thermo Fisher) or the above *PcomX* probe was titrated into this solution and the  
714 fluorescence polarization recorded. Reactions were again incubated at 37°C for 20  
715 minutes before polarization readings were taken. In all FP experiments reading was  
716 performed three times on the same plate to estimate instrument error.

717 We compared the FP data to a two-step binding model in which the peptide  
718 ComS or XIP forms a multimeric complex with ComR (with dissociation constant  $k_1$ ),  
719 and then a single copy of this complex binds to the fluorescent DNA probe (with  
720 dissociation constant  $k_2$ ), increasing its fluorescence anisotropy. The model is  
721 summarized by

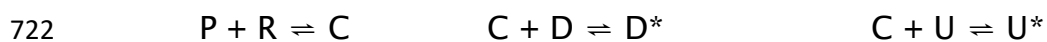

723 Here  $P$  is the peptide (ComS or XIP),  $R$  is ComR,  $C$  is the peptide-ComR multimeric  
724 complex,  $D$  ( $U$ ) is the free labeled (unlabeled) probe,  $D^*$  ( $U^*$ ) is the labeled (unlabeled)  
725 probe with complex bound. The order of multimerization of the complex  $C$  is  $n$ . We  
726 solved the equilibrium equations for the model using the multivariate Newton-Raphson  
727 method in Matlab. We performed separate data analyses for the FP data ComS and  
728 XIP, respectively. In each analysis we searched for parameter values ( $k_1$ ,  $k_2$ ,  $n$ ) that  
729 simultaneously minimized the sum of squares residuals for both the association (Figure  
730 6A) and competition (Figure 6B) experiments for a given peptide  $P$ .

731 In general the FP data are compatible with a range of parameter values. If  $n$  is  
732 constrained to be less than 2.5 then optimal values are in the range  $k_1 \sim 1\text{-}6 \mu\text{M}$  and  $k_2$   
733  $\sim 1\text{-}30 \text{ nM}$  and  $n \approx 2\text{-}2.5$  for for XIP interacting with ComR, and  $k_1 \sim 3\text{-}20 \mu\text{M}$  and  $k_2 \sim$   
734  $30\text{-}200 \text{ nM}$  and  $n \approx 1.6\text{-}2.5$  for ComS interacting with ComR.

735

### 736 **Mathematical model of *comRS* control of *comX***

737 Deterministic modeling of *comX* activation by *comRS* was performed by least  
738 squares fitting a chemical equilibrium model to the microfluidic data from experiments  
739 for each of the wild type background *PcomX* GFP strain and the  $\Delta\textit{comS}$  cells using  
740 Matlab. The same offset and multiplicative factor were used to map calculated [ComX]  
741 onto the GFP fluorescence curves for both strains, as this is a property of the GFP, not  
742 the gene circuit. In the case of the *comS* deficient strain, relevant parameters  
743 representing *comS* feedback and constitutive production were set to zero to obtain the  
744 different behavior observed. ComR was assumed to be present at around 15 copies per  
745 cell, as only modest changes in its expression were previously observed due to early  
746 competence inducing factors [53]. Exogenous XIP was taken to be a non-depleting  
747 reservoir. Details of the ODE system are in the supporting information section, and a  
748 table of parameters is available in supporting information Table S2.

749 Robustness of fit was tested through the bootstrap method, using the 90<sup>th</sup> and  
750 10<sup>th</sup> percentile behavior of parameters to examine whether the transcriptional efficiency  
751 difference hypothesized was preserved in this range. Dependence on the initial  
752 parameter guess was checked by 50 iterations of adding a Gaussian-distributed random  
753 number with a mean of the best fit parameter and standard deviation half the best fit

754 parameter to the start guess vector components used to find the best fit. New sets of fit  
755 parameters for each of these were then generated. It was found that the ComS-ComR  
756 complex elicited higher *comX* transcription in 100% of cases than did the XIP-ComR  
757 complex, and higher *comS* feedback stimulation ( $V^*$  parameters) in 78% of cases. Thus  
758 while numerous solutions to the system exist, the *comX* transcriptional efficiency  
759 discrepancy hypothesized is a generic property of the fit.

760

761

### **Acknowledgments**

762 This work was supported by 1R01 DE023339 from the National Institute of Dental and  
763 Craniofacial Research. The authors thank Minjun Son, Chris Browngardt, Natalie  
764 Maricic, Lin Zeng, Hey Min Kim and Sang-Joon Ahn for helpful discussions, provision of  
765 mutant strains and advice on experimental procedures.

766

767

## References

- 768 1. Loesche WJ. (1986) Role of *Streptococcus mutans* in human dental decay. *Microbiol Rev*  
769 50(4): 353-380.
- 770 2. Senadheera DB, Cordova M, Ayala EA, Chavez de Paz LE, Singh K, et al. (2012)  
771 Regulation of bacteriocin production and cell death by the VicRK signaling system in  
772 *Streptococcus mutans*. *J Bacteriol* 194(6): 1307-1316.
- 773 3. Ahn SJ, Lemos JA, Burne RA. (2005) Role of HtrA in growth and competence of  
774 *Streptococcus mutans* UA159. *J Bacteriol* 187(9): 3028-3038.
- 775 4. Senadheera MD, Lee AW, Hung DC, Spatafora GA, Goodman SD, et al. (2007) The  
776 *Streptococcus mutans* vicX gene product modulates gtfB/C expression, biofilm formation,  
777 genetic competence, and oxidative stress tolerance. *J Bacteriol* 189(4): 1451-1458.
- 778 5. Tremblay YDN, Lo H, Li Y, Halperin SA, Lee SF. (2009) Expression of the *Streptococcus*  
779 *mutans* essential two-component regulatory system VicRK is pH and growth-phase  
780 dependent and controlled by the LiaFSR three-component regulatory system. *Microbiology*  
781 155(9): 2856-2865.
- 782 6. Ahn SJ, Wen ZT, Burne RA. (2006) Multilevel control of competence development and  
783 stress tolerance in *Streptococcus mutans* UA159. *Infect Immun* 74(3): 1631-1642.
- 784 7. Qi F, Merritt J, Lux R, Shi W. (2004) Inactivation of the *ciaH* gene in *Streptococcus mutans*  
785 diminishes mutacin production and competence development, alters sucrose-dependent  
786 biofilm formation, and reduces stress tolerance. *Infect Immun* 72(8): 4895-4899.
- 787 8. Son M, Ghoreishi D, Ahn SJ, Burne RA, Hagen SJ. (2015) Sharply tuned pH response of  
788 genetic competence regulation in *Streptococcus mutans*: A microfluidic study of the  
789 environmental sensitivity of comX. *Appl Environ Microbiol* 81(16): 5622-5631.
- 790 9. Guo Q, Ahn SJ, Kaspar J, Zhou X, Burne RA. (2014) Growth phase and pH influence  
791 peptide signaling for competence development in *Streptococcus mutans*. *J Bacteriol*  
792 196(2): 227-236.
- 793 10. Moyer ZD, Son M, Rosa-Alberty AE, Zeng L, Ahn SJ, et al. (2016) Effects of carbohydrate  
794 source on genetic competence in *Streptococcus mutans*. *Appl Environ Microbiol* 82(15):  
795 4821-4834.
- 796 11. Son M, Ahn S, Guo Q, Burne RA, Hagen SJ. (2012) Microfluidic study of competence  
797 regulation in *Streptococcus mutans*: Environmental inputs modulate bimodal and unimodal  
798 expression of comX. *Mol Microbiol* 86(2): 258-272.
- 799 12. Reck M, Tomasch J, Wagner-Döbler I. (2015) The alternative sigma factor SigX controls  
800 bacteriocin synthesis and competence, the two quorum sensing regulated traits in  
801 *Streptococcus mutans*. *PLOS Genetics* 11(7): e1005353.

- 802 13. Son M, Shields RC, Ahn S, Burne RA, Hagen SJ. (2015) Bidirectional signaling in the  
803 competence regulatory pathway of *Streptococcus mutans*. FEMS Microbiol Lett 362(19):  
804 fnv159-fnv159.
- 805 14. Stephen J Hagen and, Minjun Son. (2017) Origins of heterogeneity in *Streptococcus*  
806 *mutans* competence: Interpreting an environment-sensitive signaling pathway. Physical  
807 Biology 14(1): 015001.
- 808 15. Khan R, Rukke HV, Høvik H, Åmdal HA, Chen T, et al. (2016) Comprehensive  
809 transcriptome profiles of *Streptococcus mutans* UA159 map core streptococcal  
810 competence genes. mSystems 1.
- 811 16. Fontaine L, Wahl A, Flécharde M, Mignolet J, Hols P. (2015) Regulation of competence for  
812 natural transformation in streptococci. Infection, Genetics and Evolution 33: 343-360.
- 813 17. Hossain MS, Biswas I. (2012) An extracellular protease, SepM, generates functional  
814 competence-stimulating peptide in *Streptococcus mutans* UA159. J Bacteriol 194(21):  
815 5886-5896.
- 816 18. Perry JA, Jones MB, Peterson SN, Cvitkovitch DG, Lévesque CM. (2009) Peptide  
817 alarmone signalling triggers an auto-active bacteriocin necessary for genetic competence.  
818 Mol Microbiol 72(4): 905-917.
- 819 19. Fontaine L, Goffin P, Dubout H, Delplace B, Baulard A, et al. (2013) Mechanism of  
820 competence activation by the ComRS signalling system in streptococci. Mol Microbiol  
821 87(6): 1113-1132.
- 822 20. Mashburn-Warren L, Morrison DA, Federle MJ. (2010) A novel double-tryptophan peptide  
823 pheromone controls competence in *Streptococcus* spp. via an rgg regulator. Mol Microbiol  
824 78(3): 589-606.
- 825 21. Desai K, Mashburn-Warren L, Federle MJ, Morrison DA. (2012) Development of  
826 competence for genetic transformation of *Streptococcus mutans* in a chemically defined  
827 medium. J Bacteriol 194(15): 3774-3780.
- 828 22. Khan R, Rukke HV, Ricomini Filho AP, Fimland G, Arntzen MO, et al. (2012) Extracellular  
829 identification of a processed type II ComR/ComS pheromone of *Streptococcus mutans*. J  
830 Bacteriol 194(15): 3781-3788.
- 831 23. Wenderska IB, Lukenda N, Cordova M, Magarvey N, Cvitkovitch DG, et al. (2012) A novel  
832 function for the competence inducing peptide, XIP, as a cell death effector of *Streptococcus*  
833 *mutans*. FEMS Microbiol Lett 336(2): 104-112.
- 834 24. Chang JC, Federle MJ. (2016) PptAB exports rgg quorum-sensing peptides in  
835 *Streptococcus*. Plos One 11(12): e0168461.
- 836 25. Gardan R, Besset C, Gitton C, Guillot A, Fontaine L, et al. (2013) Extracellular life cycle of  
837 ComS, the competence-stimulating peptide of *Streptococcus thermophilus*. Journal of  
838 Bacteriology 195(8): 1845-1855.

- 839 26. Kaspar J, Underhill SAM, Shields RC, Reyes A, Rosenzweig S, et al. (2017) Intercellular  
840 communication via the *comX*-inducing peptide (XIP) of *Streptococcus mutans*. J Bacteriol.
- 841 27. Dubnau D, Losick R. (2006) Bistability in bacteria. Mol Microbiol 61(3): 564-572.
- 842 28. Taniguchi Y, Choi PJ, Li G, Chen H, Babu M, et al. (2010) Quantifying *E. coli* proteome  
843 and transcriptome with single-molecule sensitivity in single cells. Science 329(5991): 533.
- 844 29. Friedman N, Cai L, Xie XS. (2006) Linking stochastic dynamics to population distribution:  
845 An analytical framework of gene expression. Phys Rev Lett 97(16): 168302.
- 846 30. Ahn SJ, Burne RA. (2006) The *atlA* operon of *Streptococcus mutans*: Role in autolysin  
847 maturation and cell surface biogenesis. J Bacteriol 188(19): 6877-6888.
- 848 31. Bareia T, Pollak S, Eldar A. (2018) Self-sensing in *Bacillus subtilis* quorum-sensing  
849 systems. Nat. Microbiol. 3: 83-89.
- 850 32. Maamar H, Dubnau D. (2005) Bistability in the *Bacillus subtilis* K-state (competence)  
851 system requires a positive feedback loop. Mol Microbiol 56(3): 615-624.
- 852 33. Shanker E, Morrison DA, Talagas A, Nessler S, Federle MJ, et al. (2016) Pheromone  
853 recognition and selectivity by ComR proteins among *Streptococcus* species. PLOS  
854 Pathogens 12: e1005979.
- 855 34. Aggarwal C, Jimenez JC, Nanavati D, Federle MJ. (2014) Multiple length peptide-  
856 pheromone variants produced by *Streptococcus pyogenes* directly bind rgg proteins to  
857 confer transcriptional regulation. J Biol Chem 289(32): 22427-22436.
- 858 35. Talagas A, Fontaine L, Ledesma-Garca L, Mignolet J, Li de IS, et al. (2016) Structural  
859 insights into streptococcal competence regulation by the cell-to-cell communication system  
860 ComRS. PLOS Pathogens 12(12): e1005980.
- 861 36. Lupp C, Ruby EG. (2004) *Vibrio fischeri* LuxS and AinS: Comparative study of two signal  
862 synthases. J Bacteriol 186(12): 3873-3881.
- 863 37. Hurley A, Bassler BL. (2017) Asymmetric regulation of quorum-sensing receptors drives  
864 autoinducer-specific gene expression programs in *Vibrio cholerae*. PLOS Genetics 13(5):  
865 e1006826.
- 866 38. Becskei A, S eraphin B, Serrano L. (2001) Positive feedback in eukaryotic gene networks:  
867 Cell differentiation by graded to binary response conversion. Embo J 20: 2528.
- 868 39. Youk H, Lim WA. (2014) Secreting and sensing the same molecule allows cells to  
869 achieve versatile social behaviors. Science 343(6171): 1242782.
- 870 40. Sayut DJ, Niu Y, Sun L. (2006) Construction and engineering of positive feedback loops.  
871 ACS Chem Biol 1: 692-696. 10.1021/cb6004245.



- 872 41. Nistala GJ, Wu K, Rao CV, Bhalerao KD. (2010) A modular positive feedback-based gene  
873 amplifier. *J Biol Eng* 4: 4-1611-4-4.
- 874 42. Leung V, Dufour D, Lévesque C,M. (2015) Death and survival in *Streptococcus mutans*:  
875 Differing outcomes of a quorum-sensing signaling peptide. *Frontiers in Microbiology* 6:  
876 1176.
- 877 43. Perry JA, Cvitkovitch DG, Lévesque CM. (2009) Cell death in *Streptococcus mutans*  
878 biofilms: A link between CSP and extracellular DNA. *FEMS Microbiol Lett* 299(2): 261-266.
- 879 44. Terleckyj B, Willett NP, Shockman GD. (1975) Growth of several cariogenic strains of oral  
880 streptococci in a chemically defined medium. *Infect Immun* 11(4): 649-655.
- 881 45. Biswas I, Jha JK, Fromm N. (2008) Shuttle expression plasmids for genetic studies in  
882 *Streptococcus mutans*. *Microbiology* 154: 2275-2282.
- 883 46. LeBlanc DJ, Lee LN, Abu-Al-Jaibat A. (1992) Molecular, genetic, and functional analysis  
884 of the basic replicon of pVA380-1, a plasmid of oral streptococcal origin. *Plasmid* 28(2):  
885 130-145.
- 886 47. Ho SN, Hunt HD, Horton RM, Pullen JK, Pease LR. (1989) Site-directed mutagenesis by  
887 overlap extension using the polymerase chain reaction. *Gene* 77(1): 51-59.
- 888 48. Cha RS, Zarbl H, Keohavong P, Thilly WG. (1992) Mismatch amplification mutation assay  
889 (MAMA): Application to the c-H-ras gene. *PCR Methods Appl* 2(1): 14-20.
- 890 49. Zeng L, Das S, Burne RA. (2010) Utilization of lactose and galactose by *Streptococcus*  
891 *mutans*: Transport, toxicity, and carbon catabolite repression. *J Bacteriol* 192(9): 2434-  
892 2444.
- 893 50. Ahn SJ, Kaspar J, Kim JN, Seaton K, Burne RA. (2014) Discovery of novel peptides  
894 regulating competence development in *Streptococcus mutans*. *J Bacteriol* 196(21): 3735-  
895 3745.
- 896 51. Jeon NL, Dertinger SKW, Chiu DT, Choi IS, Stroock AD, et al. (2000) Generation of  
897 solution and surface gradients using microfluidic systems. *Langmuir* 16(22): 8311-8316.
- 898 52. Kwak IH, Son M, Hagen SJ. (2012) Analysis of gene expression levels in individual  
899 bacterial cells without image segmentation. *Biochem Biophys Res Commun* 421(3): 425-  
900 430.
- 901 53. Lemme A, Grobe L, Reck M, Tomasch J, Wagner-Dobler I. (2011) Subpopulation-specific  
902 transcriptome analysis of competence-stimulating-peptide-induced *Streptococcus mutans*.  
903 *J Bacteriol* 193(8): 1863-1877.

904



905

## Figure captions

906

### **Fig. 1: *comS* deletion is not fully complemented by synthetic XIP**

907

(A) Comparison of *PcomX-gfp* activity in *S. mutans* cells of the UA159 (wild type)

908

background (magenta) and  $\Delta comS$  mutant background (cyan). The median GFP

909

fluorescence is shown for cells that were supplied with continuous flow of exogenous

910

synthetic XIP in microfluidic chambers. Data are shown at 30 minutes (circles, dash-dot

911

lines) and 90 minutes (squares, dashed lines) of flow. The smooth curves are spline fits

912

to the data. (B) Median GFP levels in the two strains at the 90 minute time point of the

913

flow experiment. Also shown are the histograms of the individual cell *PcomX-gfp*

914

reporter activity, versus exogenous XIP concentration, for (C) the UA159 background

915

and (D) the  $\Delta comS$  background. Solid black curves in (C) and (D) show the best fit

916

gamma probability distribution for each histogram. A cutoff of 40 units of *PcomX* GFP

917

fluorescence has been applied to exclude background autofluorescence. (E) Parameter

918

*a* of the (two parameter) gamma probability distribution, obtained from fits in (C)-(D),

919

reflecting the ratio of transcription rate to protein degradation rate, and (F) the

920

distribution parameter *b*, reflecting the ratio of translation rate to the rate of mRNA

921

degradation. In (E)-(F) cyan indicates the  $\Delta comS$  mutant, and magenta indicates the

922

UA159 background.

923

924

### **Fig. 2: Activation of ComX in a ComS-overexpressing strain is independent of**

925

### **rate of medium replacement**

926

*PcomX-rfp* reporter activity is shown in cells growing in microfluidic chambers supplied

927

with continuously flowing fresh complex medium (BHI). (A) Histograms of individual cell

928 *PcomX-rfp* reporter fluorescence: (Leftmost column) wild type background (negative  
929 control) with flow at 0.1 ml h<sup>-1</sup>; (Second column) ComS-overexpressing 184*comS*  
930  $\Delta$ *comS* background at 0.1 ml h<sup>-1</sup>; (Columns 3-5) ComS-overexpressing (184*comS*)  
931 background at 0.02 ml h<sup>-1</sup>, 0.1 ml h<sup>-1</sup>, 0.5 ml h<sup>-1</sup> and 1 ml h<sup>-1</sup>. (At a flow rate of 1 ml h<sup>-1</sup>  
932 the medium in each flow chamber is replaced every 6 s.) (B) RFP fluorescence of cells  
933 that exceeded the wild type (negative control) red fluorescence in column 1 of (A). The  
934 black bar indicates the median of data in each channel: (Leftmost column) 184*comS*  
935  $\Delta$ *comS* background; (Columns 2-5) ComS-overexpressing (184*comS*) background. All  
936 RFP measurements were made 4 hours after addition of chloramphenicol to the  
937 cultures.

938

939 **Fig. 3: chromosomal *comS* increases the amount of *comS* transcript produced in**  
940 **response to XIP**

941 RT-qPCR measurement of (A) *comS* and (B) *comX* transcripts in cultures harvested at  
942 OD<sub>600</sub> = 0.5. Each bar indicates the ratio of the median transcript count to the median  
943 16S rRNA count, as measured in multiple biological and technical replicates (see  
944 *Methods*). WT/BHI, 184*comS*, and 184*comS*  $\Delta$ *comS* samples were grown in BHI  
945 medium. Remaining samples were grown in FMC. XIP was supplied at 100 nM  
946 concentration when used. Error bars indicate the range from second lowest to second  
947 highest value among the replicates for each condition.

948

949 **Fig. 4: ComS overexpresser does not induce *comX* of  $\Delta$ *comS* strain in coculture**

950 Histograms of (A) GFP and (B) RFP fluorescence of individual cells in cocultures of  
951 sender (*184comS PcomX-rfp*) and receiver (*PcomX-gfp ΔcomS*) strains. Strains were  
952 grown to equal optical density, mixed in varying proportion, and then incubated in  
953 microfluidic chambers containing stationary defined medium. Blue lines indicate  
954 population medians. Panels (A) and (B) show fluorescence of: (Leftmost column)  
955 UA159 background strain containing *PcomX rfp* reporter, without added XIP (negative  
956 control); (Second column) *PcomX-gfp ΔcomS* (receiver) with added 50 nM XIP (positive  
957 control); (Columns 3-11) Cocultures of sender and receiver, with columns labeled by  
958 percentage by volume of *184comS* (sender) culture in the initial preparation of the co-  
959 culture. (C-H) Phase contrast images of cocultures, overlaid with red and green  
960 fluorescence images: (C) *PcomX-rfp* reporter in UA159 background, with no added XIP  
961 (negative control); (D) *PcomX-gfp ΔcomS* cells with 50 nM added XIP (positive control);  
962 (E) *PcomX-gfp ΔcomS* (receiver) alone, with 0% sender; (F)-(H) cocultures containing  
963 30%, 80%, and 100% sender respectively.

964

965 **Fig. 5: Evidence for release of XIP in cocultures late in growth**

966 Histograms of (A) GFP and (B) RFP fluorescence of individual cells in cocultures of  
967 receiver (*PcomX gfp ΔcomS*) and sender (*PcomX rfp 184comS*) strains, following  
968 different incubation periods. Labels at top indicate the volume fraction comprised by the  
969 sender strain in the preparation of the coculture. Histogram colors indicate incubation  
970 times: 2 h (cyan), 8 h (magenta), 12 h (green). The lower panels show the 99<sup>th</sup>  
971 percentile of the individual cell GFP (C) and RFP (D) fluorescence observed in the

972 culture, versus the culture  $OD_{600}$ . Exogenous XIP was not added, except in the positive  
973 (sender-only) control sample indicated by the inverted triangles in (C) and (D).

974

975 **Fig. 6: ComS and XIP interact with ComR to bind the *comX* promoter**

976 Fluorescence polarization assay testing interaction of ComS and XIP peptides with  
977 ComR and the *PcomX* transcriptional activation site. The DNA probe is labeled with a  
978 Bodipy FL-X fluorophore. (A) Titration of ComR into a solution containing 10  $\mu\text{M}$  of XIP  
979 (blue) or full length ComS (green), labeled DNA probe (1 nM), and 0.05  $\text{mg ml}^{-1}$  salmon  
980 DNA. Negative control (black) contains no ComS or XIP peptide. (B) Competition assay  
981 in which unlabeled promoter sequence DNA was titrated into a solution containing  
982 ComR (1.5  $\mu\text{M}$ ), fluorescent DNA probe (1 nM) and peptide (either ComS or XIP, 10  
983  $\mu\text{M}$ ) and 0.05  $\text{mg ml}^{-1}$  salmon DNA. Unlabeled *PcomX* DNA was used with XIP (blue)  
984 and ComS (green). An unlabeled *PcomS* probe was also tested for its ability to compete  
985 with the fluorescent *PcomX* probe in the presence of XIP (red) and ComS (gold). Solid  
986 curves indicate binding and competition behavior predicted by the two step model  
987 described in *Methods*, in which peptide (ComS or XIP) first forms a multimeric complex  
988 with ComR ( $k_1, n$ ), and a single copy of this complex binds to the (labeled or unlabeled)  
989 *PcomX* DNA ( $k_2$ ). For ComS binding/competition (green), the curves represent  $k_1 = 3.2$   
990  $\mu\text{M}$ ,  $k_2 = 2.2$  nM,  $n = 2.5$ . For XIP binding/competition (blue), the curves represent  $k_1 =$   
991 7.3  $\mu\text{M}$ ,  $k_2 = 33$  nM,  $n = 2.4$ .

992

993 **Fig. 7: proposed model for *comRS* regulation of *comX*.**

994 Model for *comS*-feedback enhanced activation of *PcomX-gfp* reporter by exogenous  
995 synthetic XIP. (A) Illustration of the feedback model and the role of *comS* and  
996 extracellular XIP. ComS and XIP both interact with ComR to activate transcription of  
997 *comS* and *comX*. At low concentrations of extracellular XIP, *comS* expression is very  
998 low and *comX* is not expressed. At high concentrations of extracellular XIP, XIP is  
999 imported efficiently by OppA and interacts with ComR to drive expression of both *comS*  
1000 and *comR*. Endogenously produced ComS is not readily exported in the absence of  
1001 lysis, and so intracellular accumulation of ComS drives elevated *comS* and *comX*  
1002 expression. Consequently *comX* expression at any given XIP concentration is boosted  
1003 by *comS* feedback. Cells lacking native *comS* can respond to synthetic XIP but cannot  
1004 activate *comX* to the same level as wild type. The figure describes behavior in defined  
1005 medium; In complex medium extracellular XIP is not imported [11]. (B) Comparison of  
1006 model simulation with data. Red circles indicate median *PcomX-gfp* fluorescence of the  
1007 UA159 background strain supplied with synthetic XIP in microfluidic flow; blue circles  
1008 indicate the median *PcomX-gfp* fluorescence of the  $\Delta comS$  background. Solid curves  
1009 represent calculated values from a fit in which 11 parameters were fit to the microfluidic  
1010 data, as described in *Methods*. The model relates the predicted ComX concentration to  
1011 the median GFP fluorescence by an offset and scale factor.

1012

1013

Figure 1

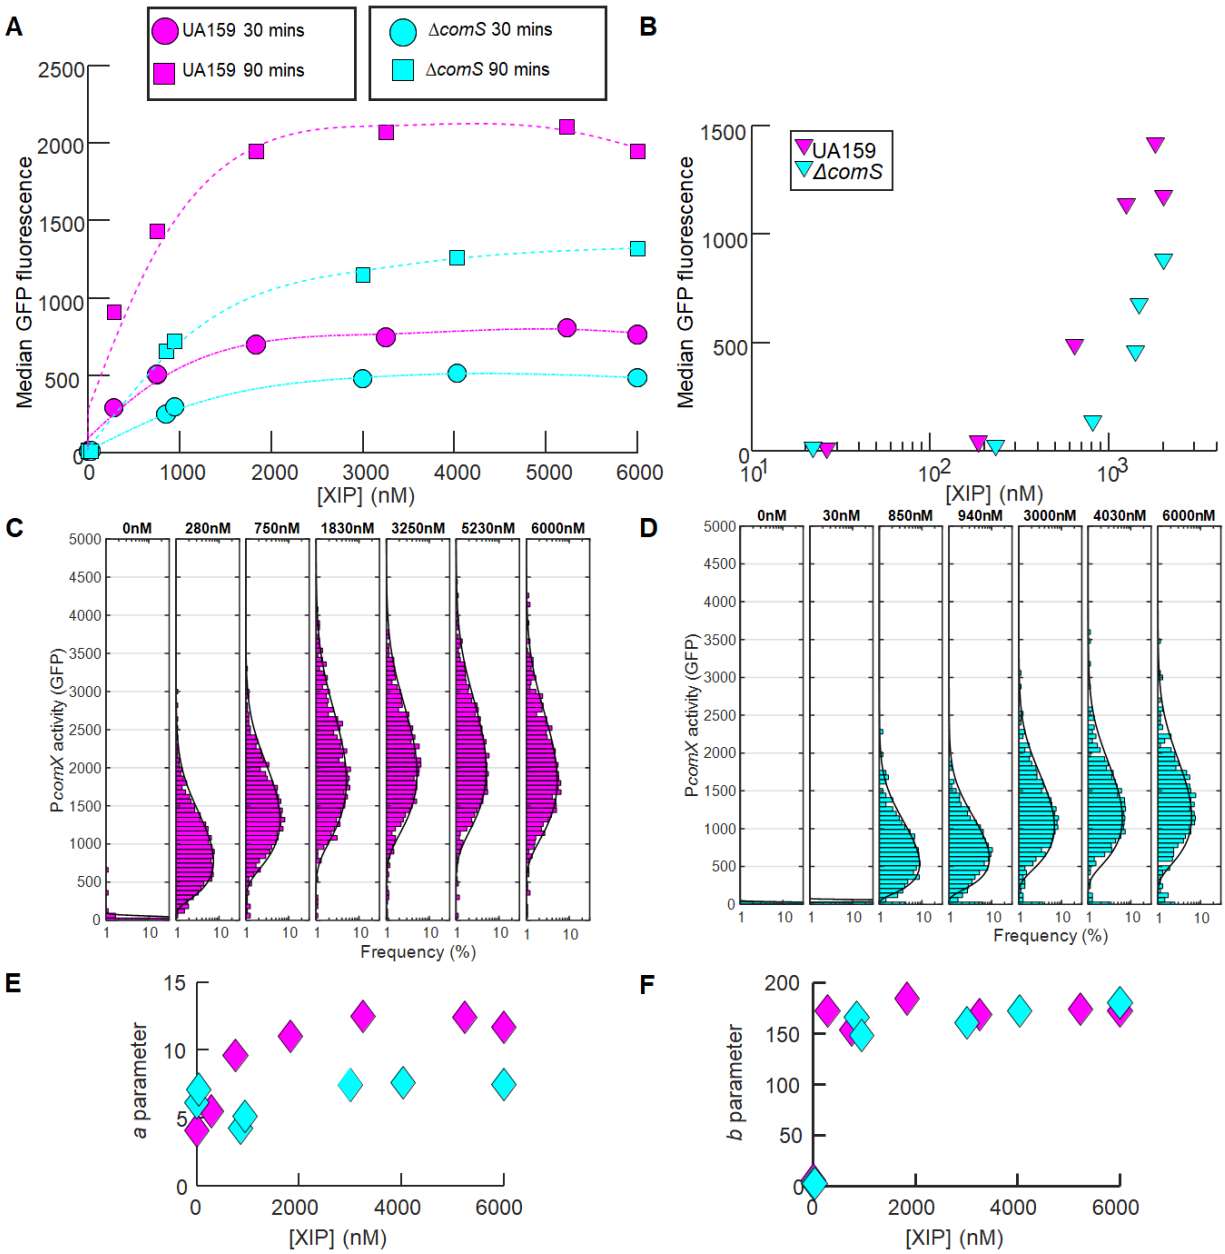

1014

1015

1016

1017

1018

1019

Figure 2

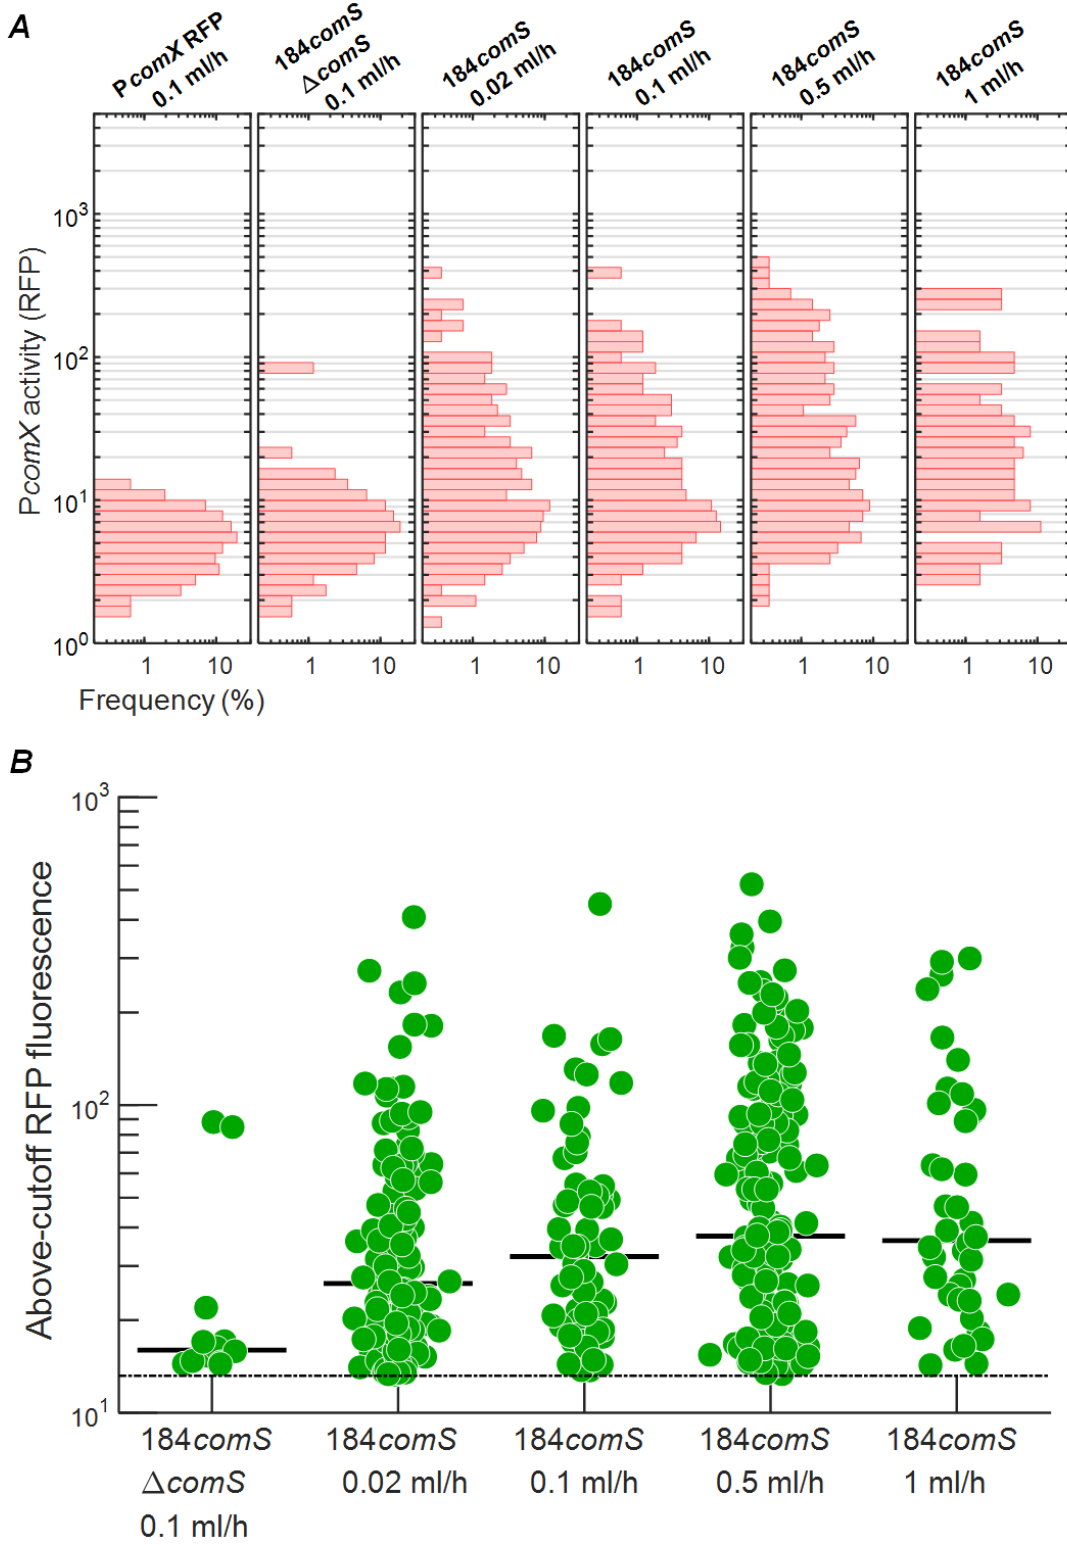

1020

1021

1022

1023

### Figure 3

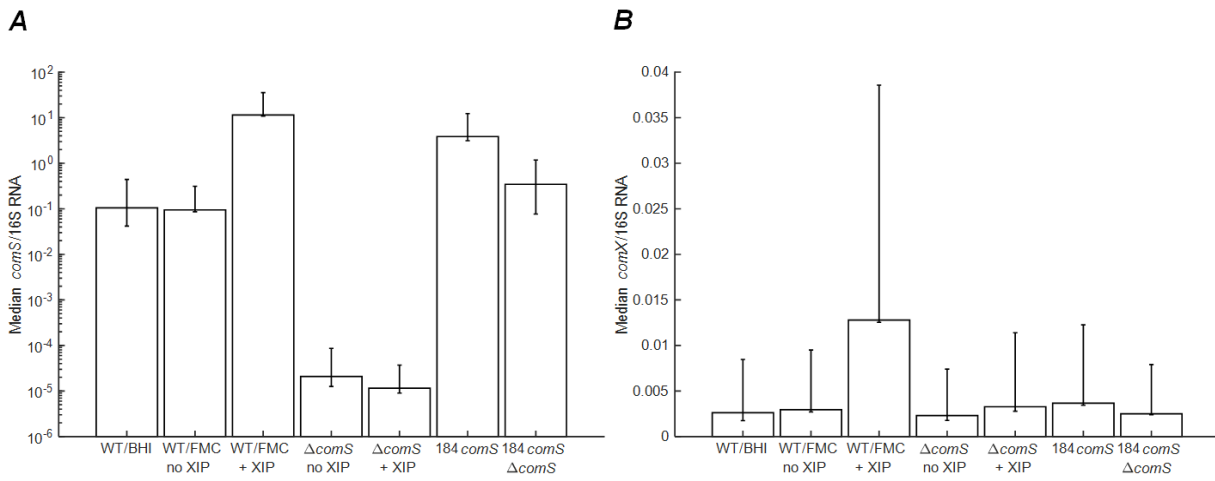

1024

1025



1026

Figure 4

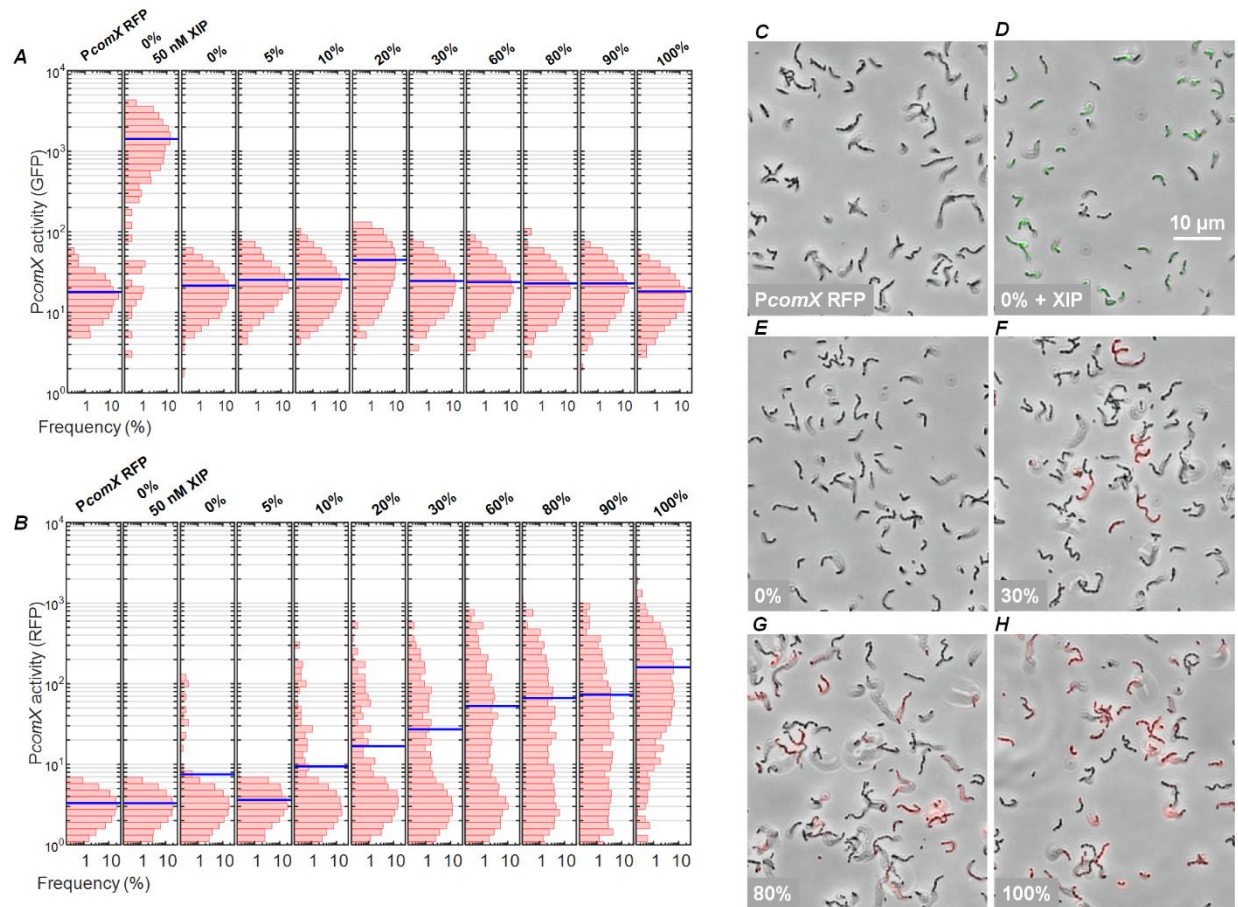

1027

1028

1029

1030

Figure 5

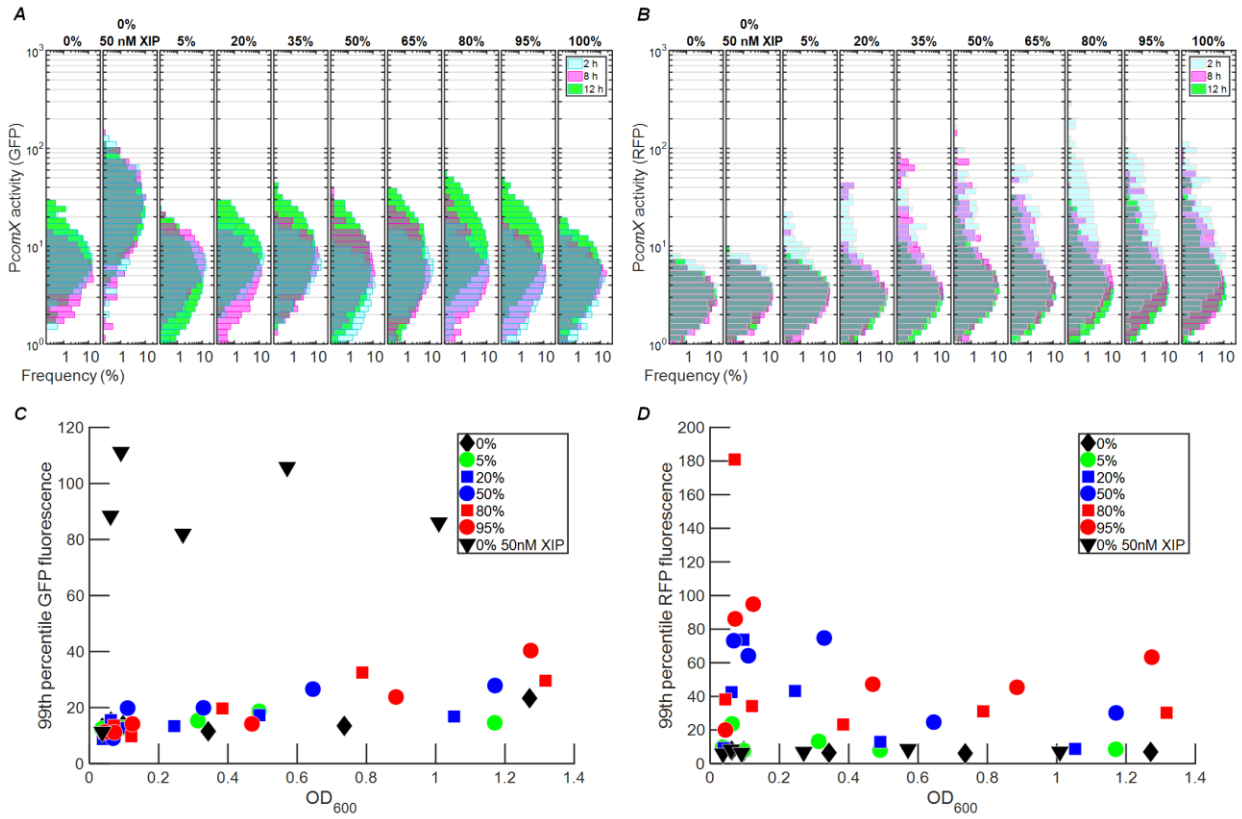

1031

1032

1033

Figure 6

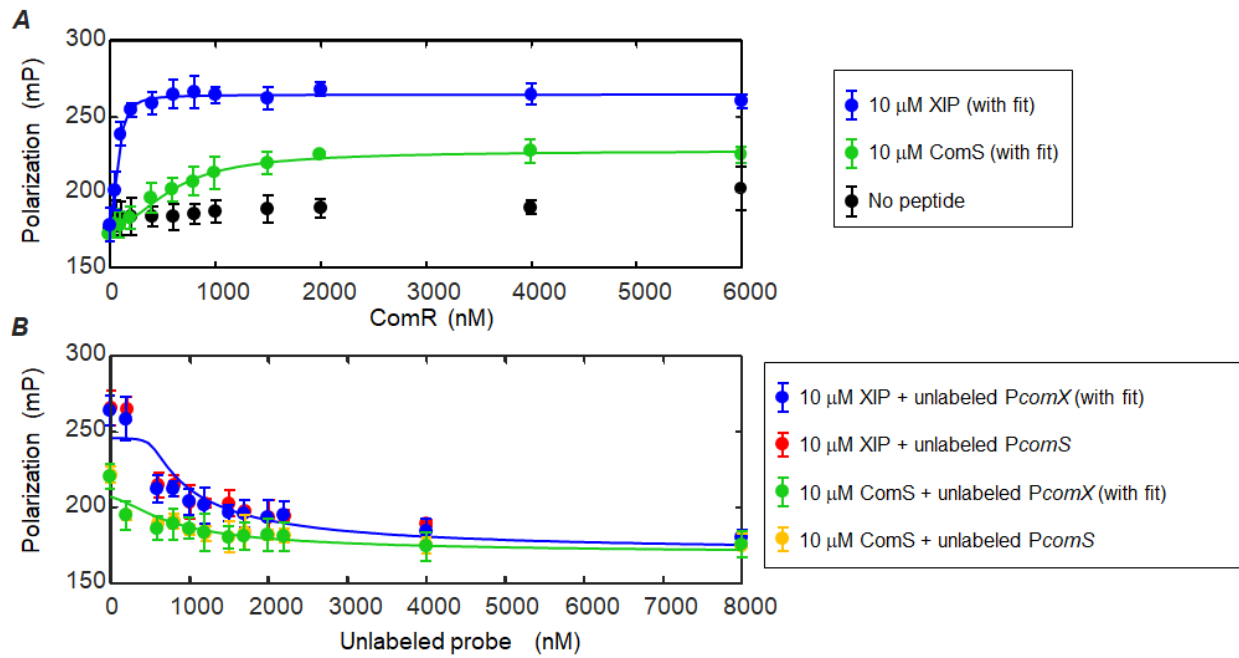

1034

1035

1036

1037

Figure 7

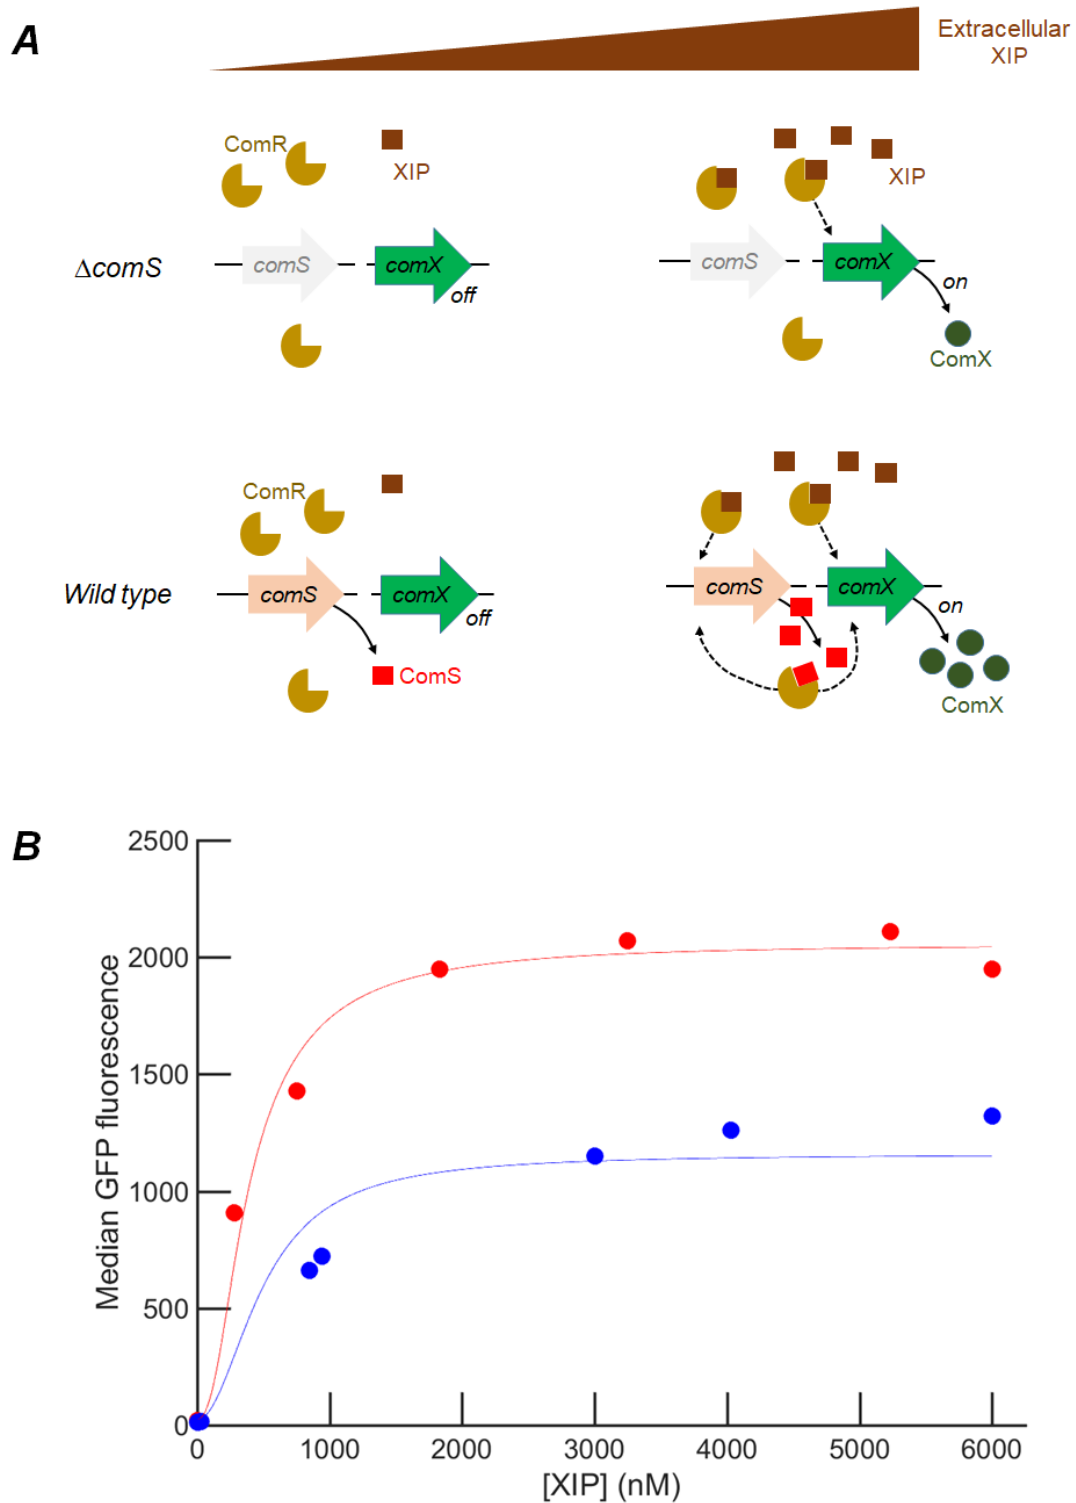

1038

1039
